# Supplementary material for: The time complexity of self-assembly
Source: PubMed Central journal article supplement (PMC8795547; doi:10.1073/pnas.2116373119), 2022-01-18
Supplement: pnas.2116373119.sapp.pdf [file pnas.2116373119.sapp.pdf]

1

2 **Supplementary Information for**  
3 **The time complexity of self-assembly**

4 **Florian M. Gartner, Isabella R. Graf and Erwin Frey**

5 **Erwin Frey**

6 **E-mail: [frey@lmu.de](mailto:frey@lmu.de)**

7 **This PDF file includes:**

- 8     Supplementary text  
9     Figs. S1 to S7 (not allowed for Brief Reports)  
10    SI References

11 **Contents**

12 **A. Supporting Information Text** **3**

13 **1 Numerical methods and implementation of the scenarios** **3**

14 Simulation . . . . . 3

15 The method of ‘homogenization’ . . . . . 4

16 Reversible binding scenario . . . . . 5

17 Dimerization scenario . . . . . 6

18 Activation scenario . . . . . 6

19 Just-in-sequence scenario . . . . . 6

20 Determination of  $T_{90}^{\min}$  and the optimal parameter . . . . . 8

21 **2 Master equation and the irrelevance of the heterogeneity of the system** **9**

22 **3 Scaling theory** **12**

23 Reversible binding for 1D structures . . . . . 12

24 Universal approach to the irreversible scenarios and reversible binding for 2D/3D structures 15

25 Dimerization scenario . . . . . 16

26 Activation scenario . . . . . 17

27 JIS scenario . . . . . 17

28 Reversible binding for 2D and 3D structures . . . . . 19

29 **4 Robustness to model modifications** **21**

30 Structures with periodic boundaries . . . . . 21

31 Heterogeneous binding rates . . . . . 21

32 Reduced resource efficiency . . . . . 21

33 Annealing (reversible binding scenario) . . . . . 22

34 Alternate input functions (activation scenario) . . . . . 22

35 **5 Experimental JIS supply protocol for the assembly of an artificial T=1 capsid** **24**

36 **B. Supplementary Figures** **26**

## 37 Supporting Information Text

38 In this Supporting Information (SI), we first discuss the numerical methods that were used in order  
39 to simulate the four scenarios and to determine their time complexity exponents. In particular, in  
40 the paragraph ‘Just-in-sequence scenario’, we show how the concentrations for the various species in  
41 the just-in-sequence scenario were determined. In the next section, we discuss the Master equation of  
42 the system and show that the heterogeneity (distinguishability) of the building blocks is irrelevant for  
43 the dynamics in the limit of large particle numbers. Subsequently, we derive analytic estimates for  
44 the time complexity and control parameter exponents using mathematical calculations and scaling  
45 arguments. These analytic estimates for the exponents are the basis for the ‘theoretical values’  
46 presented in the main text. Afterwards, we demonstrate that our results, in particular the time  
47 complexity and control parameter exponents, are robust to modifications of the model and variations  
48 in the parameters. Finally, in order to demonstrate the broad applicability of the just-in-sequence  
49 scenario, we show how the supply strategy can be used in practice for the concrete example of  
50 artificial T=1 capsid assembly.

## 51 1. Numerical methods and implementation of the scenarios

52 **Simulation.** Particle-based, stochastic simulations of the reaction kinetics of the system were per-  
53 formed using Gillespie’s algorithm (1). In the simulation, we store the numbers of active and inactive  
54 monomers of the various species in two separate linear arrays of length  $S$ . We only consider binding  
55 reactions of a species  $i$  with species  $i \pm 1$  in the one-dimensional case, additionally with  $i \pm L$  in the  
56 two-dimensional case and additionally with  $i \pm L^2$  in the three-dimensional case, see Fig. 1. All other  
57 binding rates are assumed to be 0. In the one-dimensional case, periodic boundary conditions were  
58 implemented by allowing binding reactions also between species 1 and  $S$ . Hence, the final structures  
59 represent closed rings. In the higher dimensional cases, open boundaries were implemented by  
60 reducing the number of possible binding partners of the boundary species accordingly.

61 When a complex is initiated from the dimerization reaction of two monomers, we reserve for the  
62 complex a boolean array of size  $S$ , which contains ones for the species that are contained in the  
63 complex and zeros for all other species. When additional species subsequently attach to (or detach  
64 from) the complex, the respective sites are set to one (zero) until the complex is complete and  
65 contains no more zeros. In this way, the simulation respects all possible configurations of clusters  
66 that can emerge. In order to speed up the simulation, we store for each species  $i$  an array which  
67 references all complexes to which species  $i$  can attach. The total attachment rate of species  $i$  is  
68 thereby given by the product of the rate  $\nu$  with the number of active monomers of species  $i$  and the  
69 total number of binding sites in complexes that species  $i$  can bind to. Likewise, the total dimerization  
70 rate of species  $i$  is given by the product of the dimerization rate with the number of monomers  
71 of species  $i$  and the total number of monomers species  $i$  can bind to. Note that in summing the  
72 dimerization rates of individual species in order to calculate the total dimerization rate of all species,  
73 a factor of  $1/2$  has to be included in order to avoid double counting. Whenever a species dimerizes or  
74 attaches to a complex, its number of monomers is reduced by one unit and when a species detaches  
75 from a complex, its number is increased by one unit.

76 In order to keep track of the detachment rates of the constituents of each complex, we associate  
77 with each complex additional arrays that store the indices of the constituents that detach, respectively,  
78 with rate  $\delta_1, \delta_2, \delta_3 \dots$ . Depending on the chosen values for  $A$  and  $E_B$ , however, typically some  
79  $\delta_n = Ae^{-nE_B}$  become so small that they effectively do not influence the assembly dynamics and can  
80 therefore also be neglected in order to increase efficiency. For example, rates can be set to zero if

81 the expected total number of events they will invoke during the simulated time span is much lower  
82 than 1. In any case, we assumed that constituents that have the maximum number of neighbors in  
83 a structure are always stable by setting  $\delta_{2d}$  to zero (where  $d$  is the dimensionality of the structure).  
84 This ensures that complete structures are always stable, which allows us to directly compare the  
85 various self-assembly strategies. Note that for one-dimensional structures,  $\delta_{2d} = 0$  implies that the  
86 structures do not break up in the middle but only grow and shrink by adding/detaching single  
87 monomer units at the ends. This is a reasonable assumption because by allowing structures to also  
88 break up in the middle, the assembly process would be extremely inefficient as larger structures  
89 would become increasingly more unstable. With the detachment events for a complex organized in  
90 the above-mentioned array structures, it is straight forward to calculate the total detachment rate  
91 for each complex and with it the total detachment rate for the system.

92 This was a description of the basic structure of our simulation. Additional cross-references between  
93 the various data structures were implemented to enable efficient updating of the respective rates  
94 and events after an event has happened. Optimizing the efficiency of the simulation was necessary  
95 because, for example, the reversible binding scenario generally requires a large number of Gillespie  
96 steps (up to several billion per run for the large systems) due to the reversibility of binding reactions.  
97 With these optimizations, the simulation written in C++ was able to perform more than one million  
98 Gillespie steps per second on a 3.1 GHz CPU. The C++ code of the simulation is available online.

99 **The method of ‘homogenization’.** We show in chapter 2 of this supplement, that in the case of  
100 periodic boundary conditions of the structures, the distinguishability (heterogeneity) of the species is  
101 irrelevant for the dynamics of the activation, dimerization and reversible binding scenario in the limit  
102 of large particle numbers. Therefore, these systems can also be simulated with only a single species  
103 that can occupy any site within a cluster (homogeneous system). The advantage of simulating a  
104 homogeneous rather than a heterogeneous system is that stochastic effects arising from fluctuations  
105 in the concentrations of the different species are thereby suppressed (2). Hence, in order to observe  
106 deterministic behavior, a smaller total number of particles is required for homogeneous systems,  
107 increasing the efficiency of simulations. We exploit this increase of efficiency in our simulations of  
108 the activation scenario, where stochastic effects are particularly strong. In order to simulate the  
109 system as a homogeneous system while leaving the structure of the simulation and all data types  
110 unchanged, two simple steps can be performed:

- 111 • Make monomer creation and annihilation act on all species simultaneously (i.e. if a monomer  
112 of one species is added or subtracted, add or subtract one for all other species as well),
- 113 • rescale the influx rate  $\alpha$  and dimerization rate  $\mu$  by  $S^{-1}$ .

114 The first step constrains all species to equal concentrations while the second rescales the rates as if  
115 there were only a single species. Computationally, however, it is more efficient to count only the  
116 monomers of one species explicitly instead of acting on  $S$  species simultaneously.

117 Note, in particular, that in this way complexes are still represented by the same data structure (i.e.  
118 arrays of length  $S$  filled with zeros and ones as described above) but any site can now be occupied  
119 by any monomer, irrespective of its species.

120 In the case of periodic boundary conditions of the structures, the homogeneous system is shown  
121 in chapter 2 to behave *exactly* like the heterogeneous system in the limit of large  $N$ . Hence, for  
122 one-dimensional structures, which we implemented with periodic boundary conditions, this approach  
123 is exact. In the case of non-periodic boundary conditions, however, the ‘homogenized’ system is  
124 only an approximation to the heterogeneous dynamics because not all species are equivalent any

125 more due to the presence of the boundary. Nevertheless, Figure S2 shows that this approximation  
126 is indeed very accurate for higher dimensional structures by comparing the deterministic behavior  
127 for systems with small structure size  $S$ . The overall accuracy of the approximation in the case of  
128 non-periodic boundaries is consistent with the finding that the boundary conditions as such do not  
129 have a big impact on the assembly time (see Fig. S5). We refer to this method of approximating  
130 a heterogeneous system as a homogeneous system as 'method of homogenization'. We used this  
131 method in particular for the simulations of the activation scenario in order to reduce stochastic  
132 effects and thereby avoid the necessity of simulating huge numbers of particles for the heterogeneous  
133 systems.

134 Note that, in order to investigate the system's deterministic behavior, in principle, one could  
135 also formulate and solve the chemical rate equations (ordinary differential equations). However,  
136 this approach would require a characterization of all possible cluster configurations. In other  
137 words, each state of the boolean array which describes a possible cluster configuration must be  
138 represented by a separate differential equation ('state-based' approach). Due to the large number  
139 of possible configurations for higher dimensional structures, this is not feasible without further  
140 approximations. In contrast, 'homogenization' allows to stick with a particle-based description and  
141 hence is significantly more efficient as it requires only the specification of a subset of all possible  
142 configurations (limited by the total number  $N$  of particles present in the system).

143 In the following, we discuss the parameter settings and some particularities of the individual  
144 scenarios that are relevant for their simulation. In the subsequent section, we discuss the Master  
145 equations of the system and we show the equivalence between the heterogeneous and the homogeneous  
146 system for large particle numbers.

147 **Reversible binding scenario.** For the reversible binding scenario, the parameters were set as follows:  
148  $\mu = \nu = 1$ ,  $\alpha = \infty$  (i.e. all monomers are available right from the outset),  $T_i = 0 \quad \forall i$  and a variable  
149 binding energy per contact  $E_B$  that fixes the detachment rates according to  $\delta_n = Ae^{-nE_B}$  (Arrhenius'  
150 law). We fixed the pre-exponential factor at  $A = 10^{18}C\nu$ , which appears to be a realistic choice in  
151 the light of typical experimentally measured values for  $A$  (3, 4). However, we confirmed that the  
152 choice of the constant  $A$  does not qualitatively affect our results (in particular it does not affect the  
153 exponents) as long as  $A$  is large, and hence  $\delta_1 \gg \delta_{n>1}$ . If  $A$  is small (for example  $A = 10^6C\nu$  or  
154 smaller), or when  $\delta_n$  values are chosen independently of one another, the minimal assembly time  
155 and the measured exponents can differ slightly, as then  $\delta_2$  is no longer negligible compared to  $\delta_1$  (see  
156 Fig. S1).

157 We simulated the reversible binding scenario with particle number  $N = 500$ . It is important that  
158  $N$  is chosen large enough, because for small  $N$  the measured assembly time fluctuates very strongly  
159 between independent runs and the average assembly time increases with  $N$ . Only if  $N$  is large  
160 enough does the average assembly time (measured relative to the reactive timescale  $C\nu$  as in Fig. 2)  
161 converge and become independent of  $N$ . We verified that for  $N = 500$  the remaining  $N$ -dependence  
162 is negligible. Alternatively, the method of homogenization described above can be used to reduce  
163 the role of fluctuations resulting from finite particle numbers and therefore allows the system to  
164 be simulated with fewer particles. In particular, the reversible binding scenario in one dimension  
165 can be simulated faster and more accurately in this way with a five-fold lower total particle number  
166 ( $N_{\text{tot}} = 100S$ ).

167 Generally, simulation of the reversible binding scenario is computationally much more expensive  
168 than that of the irreversible scenarios, since many more steps are generally needed owing to the  
169 fast detachment processes. Partly, a single run needed several billion Gillespie steps to complete. It  
170 is therefore useful to reduce the particle number in the simulations, as long as the results remain

171 accurate.

172 We found that with  $N = 500$ , the standard deviation in the assembly time between different runs  
173 is already rather small compared to the mean. Thus, averaging over a rather small number of  
174 independent runs (between 1 and 10) is usually sufficient. We generally found that self-averaging of  
175 the system by choosing a large particle number  $N$  is usually more effective than averaging over a  
176 large number of independent runs. The quality of the statistics can be controlled either with the  
177 help of the empirical standard deviation in the interesting observable (yield or assembly time) or  
178 visually by verifying that neighboring data points line up into smooth curves as in Fig. 3B.

179 **Dimerization scenario.** For the dimerization scenario we used  $\alpha = \infty$ ,  $T_i = 0 \forall i$ ,  $\delta_n = 0$  and  
180 a variable dimerization rate  $\mu$  as well as  $N = 1000$ . The dimerization scenario can be simulated  
181 most efficiently, because far fewer steps are needed due to the irreversibility of binding reactions.  
182 Furthermore, stochastic effects do not play an important role (2), so  $N$  can be chosen to be relatively  
183 small. Conversely, fluctuations in the assembly time between independent runs decrease with  
184 increasing  $N$ , allowing for greater accuracy in the determination of the exponents.

185 **Activation scenario.** We defined the activation scenario by  $\mu = \nu = 1$ ,  $T_i = 0 \forall i$ ,  $\delta_n = 0$  and a  
186 variable influx rate  $\alpha$ . Since the momentary concentration of active monomers is generally small  
187 for a low influx rate, the activation scenario is strongly affected by stochastic effects (see Ref.  
188 (2) for details). Furthermore, the magnitude of these stochastic effects strongly depends on the  
189 number of species, and hence on the size  $S$  of the target structure. Consequently, depending on  
190  $S$ , a large number of particles  $N$  may be required to achieve a yield  $\geq 90\%$  in the activation  
191 scenario. By “homogenizing” the system, i.e. treating species as indistinguishable and simulating a  
192 homogeneous system instead of a heterogeneous system as described above, the computational cost  
193 of the simulation can be drastically reduced using a much smaller total number of particles.

194 In the case of one-dimensional structures, which were implemented with periodic boundary  
195 conditions, the homogenized simulation is exact, in the sense that it reproduces the same yield and  
196 assembly time as obtained for the heterogeneous system in the limit of large  $N$ . In the case of  
197 open boundaries of the structures which have been implemented for the higher dimensional cases,  
198 “homogenization” yields an accurate approximation (see Fig. S2). We exploited this method to  
199 simulate the activation scenario efficiently with a total number of particles  $N_{\text{tot}} = 1000S$ , as in the  
200 dimerization scenario.

201 Note that for two-dimensional structures in the activation scenario, apparently the approximation  
202 slightly underestimates the minimal assembly time (see Fig. S2). Hence, the time complexity  
203 exponent for heterogeneous 2D structures might in reality be even closer to its theoretic value than  
204 predicted by the approximation.

205 **Just-in-sequence scenario.** For the JIS scenario, we set  $\mu = \nu = 1$ ,  $\alpha = \infty$ ,  $\delta_n = 0$  and control  
206 the time points  $T_i$  at which the different species are supplied. Species with identical  $T_i$  define a ‘batch’.  
207 We only considered the case of equidistant intervals  $\Delta T$  between successive batches. The supply  
208 protocol (see Fig. 5C) assigns the species to the batches and specifies the concentrations in which the  
209 species are supplied. In this work, we exclusively used the “onion-skin supply protocol” depicted in  
210 Fig. 5C, where structures grow radially from the center outwards. This protocol minimizes the total  
211 number of batches. As discussed in the main text, in the JIS scenario, choosing the concentrations  
212 of the species in specific, non-stoichiometric ratios is crucial in reducing competition for resources  
213 among the growing structures and enhancing the efficiency of assembly. In order to compensate  
214 for the increasing number of clusters that form through excess dimerization events, the number of

resources supplied is increased with each batch. This comes at the price, insofar as the maximum yield is limited to a value less than 1 corresponding to the number of initial seeds. The desired effect is that each species can be provided in an amount that allows all the structures currently present in the system to grow, thus reducing competition for resources to a minimum. The most efficient usage of resources is therefore achieved if all species are provided in the minimal amount so that all existing structures can grow. If a single species is provided in excess, additional nucleation events will be triggered and, consequently, all subsequent species must also be supplied in larger amounts in order to keep competition at a minimum. This would result in a lower resource- and time efficiency. The optimal concentration of a species, which allows to achieve maximal time efficiency, is therefore determined by the total number of structures formed during previous assembly steps that are capable of binding the species that has just been supplied. More precisely, for each species provided in the  $b^{\text{th}}$  batch, we supply a number

$$N_b = (1 - p)N + pSN \frac{Z_b}{Z_{\text{tot}}} \quad [1]$$

of monomers, where  $Z_1 = 0$  and  $Z_i < Z_j$  for  $i < j$ , see below. The first contribution,  $(1 - p)N$ , which is identical for all species, is the basal particle number, which defines the maximum number of complete structures that can be built. The second contribution is the excess concentration, which provides additional resources for the growing total number  $\sim Z_b$  of complexes that have already formed through excess dimerization events. Here,  $pSN$  with  $p < 1$  is the total amount of resources that is distributed unevenly among the species, and  $Z_b/Z_{\text{tot}}$  is the fraction of that amount assigned to the individual species supplied in the  $b^{\text{th}}$  batch. The normalization factor  $Z_{\text{tot}} := \sum_{i=1}^S Z_{b(i)}$ , with  $b(i)$  denoting the batch number of species  $i$ , sums the  $Z_b$  over all species, and thereby fixes the average particle number  $\bar{N}$  per species:  $\bar{N} = \frac{1}{S} \sum_{i=1}^S N_{b(i)} = (1 - p)N + pN = N$ . The basal fraction of resources  $(1 - p)$  determines the maximum yield, and hence should be at least 0.9 to meet our criterion for the assembly time. We found that  $p = 0.07$  minimizes the assembly time  $T_{90}$  and, therefore, we used this value in the simulations.

The success of the JIS strategy crucially depends on the choice of the numbers  $Z_b$ . Optimally, in order to minimize competition and achieve maximal time efficiency, the excess concentrations  $Z_b$  should reflect the number of the excess complexes relevant for a species supplied in the  $b^{\text{th}}$  batch (see Fig. S3). Approximately, the number of previous excess dimerization events will be proportional to the total number of species supplied previous to the  $b^{\text{th}}$  batch, i.e. provided by the batches 1 to  $b - 1$ . Since in the onion-skin protocol, species with batch number less than  $b$  form a  $d$ -dimensional volume (see Fig. 5C), for large  $b$  we obtain approximately:  $Z_b \sim b^d$ . Correcting this count for small  $b$  (see Fig. S3) we can further improve the efficiency by setting:

$$Z_b \sim \begin{cases} 0 & \text{if } b = 1 \\ (b + 1)^d & \text{if } b > 1 \end{cases} \quad [2]$$

for two- and three- dimensional structures and  $Z_b \sim (b - 1)$  in the 1D case. It might be possible to improve the efficiency further by assigning particle numbers  $N_s$  individually for each species, rather than identically for all species in the same batch. However, we already achieve very good results with this choice of  $Z_b$ . On the other hand, with all species in a batch being supplied in identical particle numbers, those species could likewise be indistinguishable. In this way, a regular target structure could be designed with only two distinct species, which alternately assemble the “skins of the onion” (the “homogenized” version of the JIS scenario; also see the example on capsid assembly

256 in section 5 of this SI). Furthermore, note that, if the particle numbers  $N_b$  for the different species  
 257 are chosen appropriately on average, the system becomes robust to external noise up to a certain  
 258 limit (see Fig. 5E and Fig. S7B).

259 For reasons of computational efficiency, we would like to simulate the system with a small (average)  
 260 particle number  $N$ . Note, however, that the implementation of non-stoichiometric concentrations  
 261 requires a minimum  $N$  due to the discreteness of particle numbers: In order to ensure that the right-  
 262 hand side of Eq.(1) reasonably maps onto integer values for the numbers  $N_b$ , the factor  $pSN/Z_{\text{tot}}$   
 263 that multiplies  $Z_b$  should be of the order at least  $\mathcal{O}(1)$ . In order to find a rough condition for  $N$ , we  
 264 therefore estimate the normalization factor  $Z_{\text{tot}}$ :

$$265 \quad Z_{\text{tot}} := \sum_{i=1}^S Z_{b(i)} = \sum_{b=1}^{b_{\text{max}}} m(b)Z_b \approx \int_0^{b_{\text{max}}} m(b)b^d db, \quad [3]$$

266 where in the second step we change the sum over *species* to a sum over *batches*, with  $m(b)$  denoting  
 267 the number of species in the  $b^{\text{th}}$  batch ('density of species') and  $b_{\text{max}} = \frac{d}{2}L$  being the total number  
 268 of batches (see Fig. 5C). Note that, in the onion-skin protocol, species with the same batch number  
 269 lie on rhomboidal shapes around the center species. Furthermore, the densities are symmetric about  
 270  $b_{\text{max}}/2$  (batches ii and iii have the same densities as v and vi, respectively, in the supply protocol  
 271 depicted in Fig. 5C). Hence, we approximate the density of species by

$$272 \quad m_b \sim \begin{cases} ab^{d-1} & b \leq \frac{b_{\text{max}}}{2} \\ a(b_{\text{max}} - b)^{d-1} & b > \frac{b_{\text{max}}}{2} \end{cases}, \quad [4]$$

273 where the constant  $a$  is determined from the condition  $\int_0^{b_{\text{max}}} m(b) = S$ . Performing the calculation  
 274 yields  $Z_{\text{tot}} \sim S^2$ . Hence, in order to guarantee that the prescribed ratios of the particle numbers  $N_b$   
 275 can be met, the average particle number should be  $N \gtrsim \frac{S}{p}$ .

276 We used  $N = 10^4$  in our simulations of the JIS scenario with non-stoichiometric concentrations,  
 277 with  $p = 0.07$  and a structure size  $S$  of maximally  $10^3$ . By simulating individual runs with a larger  
 278 particle number  $N = 10^5$ , we verified that the  $N$ -dependence of the assembly time is negligible for  
 279  $N \geq 10^4$ . The simulations of the JIS scenario with stoichiometric concentrations were performed  
 280 with  $N = 10^5$ , because the larger time intervals  $\Delta T$  led to very small momentary concentrations,  
 281 and hence required a larger overall particle number to achieve  $N$ -independent assembly times.

282 **Determination of  $T_{90}^{\text{min}}$  and the optimal parameter.** In order to determine the minimal assembly  
 283 time for a specified scenario and target structure, we first varied the respective control parameter  
 284 roughly to find an estimate for its optimal value that minimizes the assembly time in the simulation.  
 285 Afterwards, we sampled the parameter range around the estimated parameter value thoroughly by  
 286 varying the control parameter in equidistant increments of approximately 2-4 percent precision. For  
 287 each parameter value, the assembly time was averaged over several independent runs (50-100 for  
 288 the irreversible scenarios and 5-50 for the reversible binding scenario). The minimal assembly time  
 289  $T_{90}^{\text{min}}$  was then determined as the minimum of the averaged assembly times, and the corresponding  
 290 parameter value was chosen as the optimal parameter value. If the minimum of the assembly times  
 291 was attained at the boundary of the sampled parameter range, we increased the range in the direction  
 292 of the respective boundary and simulated additional parameter values. We repeatedly increased the  
 293 range (or modified the parameter estimate) until we found a minimum that was attained somewhere  
 294 in the middle of the sampled range to ensure that the global minimum has been identified.



## 2. Master equation and the irrelevance of the heterogeneity of the system

Here we show the moment equations resulting from the stochastic Master equation that describe the assembly kinetics for one-dimensional structures. The higher dimensional cases are conceptually similar to the one-dimensional case but do not allow for a simple representation of all possible cluster configurations. Therefore, we restrict ourselves to illustrating the mathematical framework only for the 1D case. The moment equations are subsequently used to show that for structures with periodic boundaries, the heterogeneity (distinguishability of species) is irrelevant in the limit of large  $N$ . This is the basis of our ‘method of homogenization’, which exploits the equivalence between heterogeneous and homogeneous systems in order to increase the efficiency of the simulations.

For one-dimensional structures, each possible kind of polymer can be characterized by two variables: the length  $\ell$  of the polymer, and the monomer species  $s$  at its right end which will be referred to as the species of the polymer. We denote by  $n_\ell^s(t)$  with  $2 \leq \ell < L$  and  $1 \leq s \leq S$  the number of polymers of size  $\ell$  and species  $s$  in the system at time  $t$ . Furthermore,  $n_0^s$  and  $n_1^s$  denote the number of inactive (not yet added) and active monomers of species  $s$ , respectively, and  $n_L$  the number of complete structures.

The subsequent set of equations can then be interpreted in two different ways: Either all terms with a species index (upper index) outside the range  $1 \leq s \leq S$  are considered as zero or species indices are taken modulo  $S$ . The first case describes the self-assembly of structures with an open, non-periodic boundary. In contrast, the second case describes the assembly process of a periodic structure, i.e. a ring in this 1D case (the case considered in the main text). We show in section 4 of this SI that the choice of the boundary condition only has a small effect on the assembly time and, in particular, does not affect the control parameter and time complexity exponents. By  $\langle \dots \rangle$  we indicate (ensemble) averages. The system governing the evolution of the first moments (the averages) of the  $\{n_\ell^s\}$  is then given by:

$$\frac{d}{dt} \langle n_0^s \rangle = -\alpha \Theta(t - T_s) \langle \Theta(n_0^s) \rangle, \quad [5a]$$

$$\begin{aligned} \frac{d}{dt} \langle n_1^s \rangle = & \alpha \Theta(t - T_s) \langle \Theta(n_0^s) \rangle - \mu \left( \langle n_1^s n_1^{s+1} \rangle + \langle n_1^s n_1^{s-1} \rangle \right) \\ & - \nu \sum_{\ell=2}^{L-1} \left( \langle n_1^s n_\ell^{s+\ell} \rangle + \langle n_1^s n_\ell^{s-1} \rangle \right) + \delta \sum_{\ell=2}^{L-1} \left( \langle n_\ell^{s+\ell-1} \rangle + \langle n_\ell^s \rangle \right), \end{aligned} \quad [5b]$$

$$\frac{d}{dt} \langle n_2^s \rangle = \mu \langle n_1^{s-1} n_1^s \rangle - \nu \left( \langle n_1^{s-2} n_2^s \rangle + \langle n_2^s n_1^{s+1} \rangle \right) + \delta \left( \langle n_3^s \rangle + \langle n_3^{s+1} \rangle - 2 \langle n_2^s \rangle \right), \quad [5c]$$

$$\begin{aligned} \frac{d}{dt} \langle n_\ell^s \rangle = & \nu \left( \langle n_1^{s-\ell+1} n_{\ell-1}^s \rangle + \langle n_{\ell-1}^{s-1} n_1^s \rangle - \langle n_1^{s-\ell} n_\ell^s \rangle - \langle n_\ell^s n_1^{s+1} \rangle \right) \\ & + \delta \left( \langle n_{\ell+1}^s \rangle + \langle n_{\ell+1}^{s+1} \rangle \right) \mathbf{1}_{\{\ell \leq L-2\}} - 2\delta \langle n_\ell^s \rangle, \quad 3 \leq \ell < L, \end{aligned} \quad [5d]$$

$$\frac{d}{dt} \langle n_L \rangle = \nu \sum_{s=1}^L \left[ \langle n_1^{s-L+1} n_{L-1}^s \rangle + \langle n_{L-1}^{s-1} n_1^s \rangle \right]. \quad [5e]$$

Eq. (5a) and the first term in Eq. (5b) describe the influx of monomers of species  $s$  into the system starting at time  $T_s$  with a constant rate  $\alpha$  until all inactive monomers have been added (which, on average, will be at time  $T_s + \frac{1}{\alpha}$ ). Here,  $\Theta$  denotes the Heaviside function. Besides the influx of monomers, the temporal change in the number of active monomers (Eq. (5b)) is governed by the following processes: dimerization of monomers at rate  $\mu$ , binding of monomers to the left and to the right end of existing polymers at rate  $\nu$  and detachment of monomers from the left and right end of polymers with rate  $\delta$ .

317 Equations (5c) and (5d) describe the dynamics of dimers and larger polymers of size  $3 \leq \ell < L$ ,  
 318 respectively. The terms account for dimerization of active monomers as well as all possible kinds of  
 319 reactions of polymers with monomers, together with detachment of monomers from polymers. The  
 320 indicator function  $\mathbf{1}_{\{\ell \leq L-2\}}$  in Eq. (5d) (which equals 1 if the condition  $\ell \leq L-2$  is satisfied and 0  
 321 otherwise) excludes source terms that would account for detachment from completed structures,  
 322 which are assumed to be stable. Finally, the complete structures form an absorbing state and,  
 323 therefore, include only the respective gain terms (cf. Eq (5e)).

324 For sufficiently large particle numbers  $N$ , correlations between the particle numbers  $\{n_\ell^s\}$  in  
 325 Eq. (5) can be neglected and the two-point correlator can be approximated as the product of the  
 326 corresponding mean values (mean-field approximation):

$$327 \quad \langle n_i^s n_j^k \rangle = \langle n_i^s \rangle \langle n_j^k \rangle \quad \forall s, k \quad [6]$$

328 Note that, in the case of periodic boundary conditions and if  $T_i = T_j \quad \forall i, j$ , all species are equivalent.  
 329 Mathematically, this is reflected by the invariance of Eq. (5) with respect to relabelling the upper  
 330 indices if  $T_i = T_j$ . This symmetry of the system allows us to drop the distinction by species and to  
 331 define the homogeneous concentrations

$$332 \quad \langle n_\ell^s \rangle = \langle n_\ell^k \rangle := c_\ell V \quad \forall s, k, \quad [7]$$

where  $V$  is the reaction volume. Setting  $T_i = T_j = 0$  and rescaling the rate constants  $\mu$  and  $\nu$  by  
 a factor of  $V$ , Eq. (5) thereby reduces to a set of rate equations for a homogeneous (one species)  
 system in the deterministic limit  $N \rightarrow \infty$ :

$$\frac{d}{dt} c_0 = -\alpha \Theta(c_0), \quad [8a]$$

$$\frac{d}{dt} c_1 = \alpha \Theta(c_0) - 2\mu c_1^2 - 2\nu \sum_{\ell=2}^{L-1} c_\ell c_1 + 2\delta \sum_{\ell=2}^{L-1} c_\ell, \quad [8b]$$

$$\frac{d}{dt} c_2 = \mu c_1^2 - 2\nu c_1 c_2 + 2\delta (c_3 - c_2), \quad [8c]$$

$$\frac{d}{dt} c_\ell = 2\nu (c_1 c_{\ell-1} - c_1 c_\ell) + 2\delta c_{\ell+1} \mathbf{1}_{\{\ell \leq L-2\}} - 2\delta c_\ell, \quad 3 \leq \ell < L, \quad [8d]$$

$$\frac{d}{dt} c_L = \nu c_1 c_{L-1}. \quad [8e]$$

333 Note that, in transforming Eq. (5e), we had to multiply by a factor of  $L^{-1}$  because the complete rings  
 334 on the left hand side of Eq. (5e) are not distinguished into species. Therefore, in the deterministic  
 335 limit, the heterogeneous system decouples into  $S$  independent homogeneous assembly processes for  
 336 the  $S$  different species. This means that, in the case of periodic boundary conditions and if the  
 337 particle number  $N$  is large, the heterogeneity (distinguishability of species) is irrelevant; also see ref.  
 338 (2) for more details. This holds true for the activation, dimerization and reversible binding scenario  
 339 where  $T_i = T_j$ .

340 The equivalence of species no longer holds exactly in the absence of periodic boundary conditions  
 341 because then the species at the boundary of the structure violate the symmetry. However, the  
 342 symmetry still holds approximately and the heterogeneous system can well be approximated by  
 343 a corresponding homogeneous system for large  $N$  as described in the previous section. Figure S2  
 344 shows that in the case of non-periodic boundaries, this approximation is still quite accurate by  
 345 comparing the deterministic behavior for systems with small structure size  $S$ .

346 This result shows that our time complexity analysis of the activation, dimerization and reversible  
347 binding scenario does not depend on the heterogeneity of the system and therefore applies to a broad  
348 range of natural and artificial self-assembling systems. Furthermore, the (approximate) deterministic  
349 equivalence between heterogeneous and homogeneous systems can be exploited in order to speed  
350 up the simulations: While heterogeneous systems may be strongly affected by stochastic effects  
351 arising from fluctuations in the concentrations of the different species (for example in the activation  
352 scenario), homogeneous systems suppress these stochastic effects (2). Hence, in order to observe  
353 deterministic behavior, a smaller total number of particles is required for homogeneous systems,  
354 increasing the efficiency of simulations. We exploit this behavior in our ‘method of homogenization’  
355 as described in the previous section.

### 3. Scaling theory

In this section, we provide a mathematical scaling analysis in order to derive the characteristic exponents for the four scenarios analytically, supporting our numerical findings. We first discuss the reversible binding scenario for one-dimensional structures, followed by a unified approach to the irreversible scenarios as well as the reversible binding scenario for higher dimensional structures. Note that only the one-dimensional reversible binding scenario is fully reversible, while in the higher dimensional cases one can identify quasi-stable intermediate assembly products that form irreversibly. Exploiting the (stepwise) irreversibility of the assembly kinetics allows to analyze reversible binding for higher dimensional structures together with the irreversible scenarios in a unified approach, whereas reversible binding in one dimension needs to be analyzed separately.

#### Reversible binding for 1D structures

To mathematically analyze the scaling behavior of the one-dimensional reversible binding scenario, we need to identify the optimal value of the detachment rate  $\delta := \delta_1$  that minimizes the time taken to achieve a yield of 90%, depending on the size of the target structure. Since generally several unfinished structures exist at the same time and thereby compete for resources when growing, an exact analysis requires knowledge of the full temporal evolution of the polymer size distribution, which is very hard to obtain. Therefore, we will make two simplifying assumptions to obtain the scaling behavior: First, we employ a quasi-stationarity assumption,  $\partial_t m = 0$ , for the monomer concentration. While this may seem to be a rather drastic postulate, the idea is rather intuitive: During the assembly process, structures grow by consumption of monomers and, vice versa, the number of monomers increases due to their detachment from structures. As a result, in the limit of large structure sizes where many attachment and detachment events occur before any structure is completed, the concentration of monomers adjusts itself over time in such a way that attachment and detachment roughly balance and the monomer concentration is constant. As we will show more explicitly below, in this case the polymer size distribution corresponds to a random walk on a one-dimensional lattice with constant hopping rates. To proceed, we then make a second, important assumption: We postulate that the scaling of the time to obtain a yield of 90% is the same as the scaling of the mean first-passage time of the approximate random walk to reach the absorbing boundary at  $x = S$  (complete structure). This amounts to assuming that growth of structures is the time-limiting step and that the corresponding timescale does not change considerably over the course of the assembly process, e.g. the times to obtain 50 or 90% yield scale similarly with the structure size. With these assumptions, we identify the time complexity exponent to be 4 and the control parameter exponent to be -2, as we will outline in more detail in the following.

In the reversible binding scenario, we have  $T_s = 0 \forall s$  and  $\alpha \rightarrow \infty$ . With the reaction rate  $\nu$ , the dimerization rate  $\mu$  and the detachment rate  $\delta$ , the deterministic equations for the temporal evolution of the concentrations are (see Eqs. (5) for the general case):

$$\begin{aligned}\partial_t m &= -2\mu m^2 - 2\nu m \sum_{j=2}^{S-1} c_j + 2\delta \sum_{j=2}^{S-2} c_j \\ \partial_t c_2 &= \mu m^2 - 2\nu m c_2 - \delta c_2 + 2\delta c_3 \\ \partial_t c_i &= 2\nu m (c_{i-1} - c_i) - 2\delta (c_i - c_{i+1}) \quad i = 3, \dots, S-2 \\ \partial_t c_{S-1} &= 2\nu m (c_{S-2} - c_{S-1}) - 2\delta c_{S-1} \\ \partial_t c_S &= 2\nu m c_{S-1}\end{aligned} \tag{9}$$

where  $m$  is the number of monomers per species and  $c_i$  the number of  $i$ -mers. Defining  $K = \sum_{j=2}^{S-1} c_j$  to be the number of unfinished complexes, the temporal evolution for the monomers is given by

$$\partial_t m = -2\mu m^2 - 2(\nu m - \delta)K.$$

389 In the quasi-stationary limit,  $\partial_t m = 0$ , the evolution of the polymer-size distribution  $\partial_t c_i$  can  
 390 be identified with a random walk on a one-dimensional lattice with constant hopping rates  $2\nu m$   
 391 to the right and  $2\delta$  to the left, corresponding to monomer attachment and monomer detachment,  
 392 respectively (see also the deterministic analogue in Eq. (9)). Since completed structures are stable,  
 393 the right end at  $i = S$  is absorbing, implying that  $c_S = 0$  or, in the continuum limit,  $c(l = S) = 0$ .  
 394 Furthermore, we assume that all particles are provided at  $t = 0$  at the left end  $l = 0^*$ . The  
 395 last two points imply that the polymer concentration  $c(t, l)$  decreases over time. As a measure  
 396 for the quasi-stationary properties of the system, we therefore consider the temporally integrated  
 397 concentration  $I(l) = \int_0^\infty dt c(t, l)$ .

In the continuum limit, Eq. (9) becomes  $\partial_t c(t, l) = -2(\nu m - \delta)\partial_l c(t, l) + (\nu m + \delta)\partial_l^2 c(t, l)$ . Using that  $c(t \rightarrow \infty, l) = 0 \forall l$  and  $c(0, l) = 0 \forall l > 0$ , the integrated concentration satisfies  $v\partial_l I(l) = D\partial_l^2 I(l)$  where

$$v = 2(\nu m - \delta)$$

is the drift coefficient and

$$D = \nu m + \delta$$

is the diffusion constant of the random walk. Its solution is given by

$$I(l) = C(1 - e^{v(l-S)/D})$$

398 where  $C$  is an integration constant that is related to the number of injected particles. It will, however,  
 399 not be relevant for the calculation of the first-passage time.

We will use the integrated concentration to calculate the time-averaged mean size of unfinished polymers. This quantity is helpful to determine the number of monomers self-consistently as conservation of particles requires  $m + \sum_{j=2}^S j c_j = N$ . Before yield sets in this can be rewritten as  $m + \sum_{j=2}^{S-1} j c_j = N$ . Furthermore, the sum can be expressed in terms of the average polymer size of unfinished polymers  $\langle j \rangle$  as  $\sum_{j=2}^{S-1} j c_j = \langle j \rangle \sum_{j=2}^{S-1} c_j = \langle j \rangle K$ . In the continuum limit, we find the following self-consistency equations:

$$N = m + \langle l \rangle K \tag{10}$$

$$\langle l \rangle = \frac{\int_0^S dl l I(l)}{\int_0^S dl I(l)} = -\frac{D}{v} + \frac{S^2 v}{2(Sv + D(-1 + e^{-Sv/D}))}. \tag{11}$$

From the quasi-stationarity condition  $\partial_t m = 0$ , we furthermore find

$$m^2 + \frac{\mu}{\mu} m K - \frac{\delta}{\mu} K = 0. \tag{12}$$

Taken together, we have three conditions (10), (11) and (12) to determine three unknown variables  $m$ ,  $K$  and  $\langle l \rangle$  self-consistently (for fixed  $\delta$ ). Furthermore, we have another unknown, the optimal

\* Since we are interested in the limit of large  $S$ , we approximate  $S - 2 \approx S$  and, thus, do not distinguish whether particles are injected at  $l = 0$ ,  $l = 1$  or  $l = 2$ .

monomer detachment rate  $\delta_{opt}$ . So, we need another equation, namely by minimizing the first-passage time. The mean first-passage time for the above random walk is given by

$$\langle T \rangle = \frac{L}{v} - \frac{D}{v^2}(1 - e^{-vL/D}). \quad [13]$$

400 What is left to do is to determine  $m$ ,  $K$ ,  $\langle l \rangle$  and  $\delta_{opt}$  self-consistently from (10), (11) and (12) and  
401 from minimizing the mean first-passage time (13).

As a first step, we use condition (12) to write  $\delta = \nu m + \mu \frac{m^2}{K}$ . Correspondingly, we find

$$D = 2\nu m + \mu \frac{m^2}{K}$$

$$v = -2\mu \frac{m^2}{K}$$

for the drift and diffusion constant in terms of  $m$  and  $K$ . Using condition (11) together with the particle conservation condition (10) and with the mean-first passage time (13), we end up with the two defining equations for  $m$  and  $K$ :

$$N = m + \frac{\nu K^2}{\mu m} + \frac{K}{2} + \frac{S^2 K}{2(S + (\frac{\nu K}{\mu m} + \frac{1}{2}))(1 - e^{-\frac{Sm}{\frac{\nu K}{\mu} + \frac{m}{2}}})}$$

$$\langle T \rangle = -\frac{K}{2\mu m^2}(S + (\frac{\nu K}{\mu m} + \frac{1}{2}))(1 - e^{-\frac{Sm}{\frac{\nu K}{\mu} + \frac{m}{2}}}).$$

To make progress, we make a last approximation, namely that  $m \ll K$ . This assumption is justified a posteriori and leads to

$$N = \frac{\nu K^2}{\mu m} + \frac{S^2 K}{2(L + \frac{\nu K}{\mu m}(1 - e^{S\frac{\mu m}{\nu K}}))}$$

$$\langle T \rangle = -\frac{K}{2\mu m^2}(S + \frac{\nu K}{\mu m}(1 - e^{S\frac{\mu m}{\nu K}}))$$

or, in slightly rewritten form,

$$\frac{(S\frac{\mu m}{\nu K})^2}{2(1 - \frac{\mu m N}{\nu K^2})} = e^{S\frac{\mu m}{\nu K}} - 1 - S\frac{\mu m}{\nu K} \quad [14]$$

$$\langle T \rangle = \frac{S^2 K^2}{4\mu m(\frac{\nu K^2}{\mu} - Nm)}. \quad [15]$$

Intriguingly, the first condition (14) is recast in terms of two dimensionless variables  $a = \frac{S\mu m}{\nu K}$  and  $b = \frac{N\mu m}{\nu K^2}$  as

$$e^a - 1 - a = \frac{1}{2(1 - b)}a^2 \quad [16]$$

whose possible solutions are independent of all other parameters of the system and, in particular, independent of  $S$ . Furthermore, the average first-passage time then becomes

$$\langle T \rangle = \frac{\mu S^4}{\nu^2 4N} \frac{b}{a^2(1 - b)}. \quad [17]$$

In order to minimize  $\langle T \rangle$ , thus, the term  $b/(a^2(1-b))$  has to be minimized under the constraint (16). This minimization procedure is entirely independent of  $S$  and we conclude that the average first-passage time scales as

$$\langle T \rangle \sim \frac{\mu S^4}{4\nu^2 N}. \quad [18]$$

Similarly,  $m$  and  $K$  behave as

$$m = \frac{\nu N a_{opt}^2}{\mu S^2 b_{opt}} \sim \frac{\nu N}{\mu S^2}$$

$$K = \frac{N a_{opt}}{S b_{opt}} \sim \frac{N}{S}.$$

From these scaling functions, we can finally determine the scaling of  $\delta_{opt}$  from (12):

$$\delta_{opt} = \frac{\nu^2}{\mu} \left( m + \frac{m^2}{K} \right) = \frac{\nu^2}{\mu} \left( \frac{N a_{opt}^2}{S^2 b_{opt}} + \frac{N a_{opt}^3}{S^3 b_{opt}} \right) \sim \frac{\nu^2 N}{\mu S^2},$$

402 where we neglected the higher-order scaling  $\sim \frac{N}{S^3}$ . This yields the parameter exponent  $\phi = -2$ .

As a last step, we can actually determine  $a_{opt}$  and  $b_{opt}$  numerically from minimizing  $b/(a^2(1-b))$  under the constraint (16). This procedure yields

$$a_{opt} \approx 2.687$$

$$b_{opt} \approx 0.672$$

and plugging in these values into the formulas for  $\langle T \rangle$  and  $\delta_{opt}$  we get:

$$\langle T \rangle \approx 0.07 \frac{\mu S^4}{\nu^2 N} \quad [19]$$

$$\delta_{opt} \approx \frac{\nu^2}{\mu} \left( 10.74 \frac{N}{S^2} + 28.87 \frac{N}{S^3} \right) \approx 10.74 \frac{\nu^2 N}{\mu S^2}. \quad [20]$$

403 Combining the scaling behavior of  $m$  and  $\delta_{opt}$ , we find that the drift coefficient  $D$  vanishes to lowest  
 404 order and the polymer size distribution behaves as a purely diffusive process. Intriguingly, this is  
 405 true not only in the optimal case but follows more generally from the quasi-stationarity assumption:  
 406 the system self-organizes into a diffusion process without drift where growth of structures and  
 407 detachment of monomers balance. The optimal parameter choice thus corresponds to maximizing  
 408 the diffusive flux through the system.

## 409 **Universal approach to the irreversible scenarios and reversible binding for** 410 **2D/3D structures**

411 For the irreversible scenario as well as the reversible binding scenario in higher dimensions, one  
 412 can use a unified scaling approach by demanding a specified ratio between the total nucleation  
 413 and attachment rate. For reversible binding in higher dimensions, this approach works as well  
 414 because during their growth processes, clusters pass through stable intermediate states whose decay  
 415 rate is negligible against their growth rate. Hence, transitions between these stable intermediates  
 416 can effectively be considered as irreversible. Consequently, the reversible binding scenario for

417 higher dimensional structures is fundamentally different from the reversible binding scenario for  
 418 one-dimensional structures, whose dynamics was described by a random walk. After we introduce  
 419 the general ansatz, we will first use it to derive the parameter and time complexity scaling for the  
 420 irreversible scenarios and afterwards for the higher-dimensional reversible binding scenario.

421 It is possible to derive simple scaling relations for the time efficiency, because the simulations show  
 422 that in the irreversible scenarios, the respective control parameter is optimal (achieving a minimal  
 423  $T_{90}$  assembly time) close to where the *final* yield is approximately 90% (see main text Fig. 4A,B).  
 424 This is plausible because in all scenarios the control parameter defines the rate limiting time scale  
 425 and hence the parameter is optimal close to where the desired yield is barely reached. Therefore,  
 426 the scaling of the optimal parameter can be determined by identifying a scaling relation that fixes  
 427 a constant final yield. In order for the final yield to be independent of the size  $S$  of the target  
 428 structure, the ratio between the total nucleation and total attachment rate must scale inversely with  
 429  $S$ . To put it simply: if the size of the target structure is doubled, in order to achieve a constant  
 430 yield, there need to be twice as many growth events relative to the same number of initiation events.

$$431 \frac{\text{total number of nucleation events per time}}{\text{total number of attached monomers per time}} := \frac{\mu_{\text{tot}}}{\nu_{\text{tot}}} \stackrel{!}{\sim} \frac{1}{S}. \quad [21]$$

432 (By the exclamation mark we indicate that we demand the relation to hold in order to guarantee  
 433 a constant yield.) This formula provides the starting point of our argument. In the following  
 434 paragraphs we identify the total nucleation rate  $\mu_{\text{tot}}$  and total attachment rate  $\nu_{\text{tot}}$  for the three  
 435 irreversible scenarios as well as for the reversible binding scenario in higher dimensions.

## 436 Dimerization scenario

437 In the dimerization scenario, we focus on one-dimensional structures only. The higher dimensional  
 438 cases are related to the one-dimensional case via rescaling of the reaction rate  $\nu \rightarrow \nu S^{(d-1)/d}$  as  
 439 explained in the main text.

440 The total nucleation rate depends quadratically on the momentary concentration of active  
 441 monomers  $m$  per species and linearly on  $S$  (number of possible dimerization partners).

$$442 \mu_{\text{tot}} = \mu m^2 S \quad [22]$$

443 The total attachment rate is given by the product of the total concentration of complexes  $K$  in the  
 444 system and the concentration of monomers per species.

$$445 \nu_{\text{tot}} = \nu K m \quad [23]$$

446 Note that the total concentration of complexes  $K$  will scale with  $C = \frac{N}{V}$  (which sets the scale for all  
 447 concentrations in the system) but can be assumed to be independent of  $S$  as we demand a constant  
 448 yield (note that a constant yield implies a constant fraction of complexes  $K/C$ ). Therefore,

$$449 \frac{\mu_{\text{tot}}}{\nu_{\text{tot}}} \sim \frac{\mu S m}{\nu C} \stackrel{!}{\sim} \frac{1}{S}, \quad [24]$$

450 in order to obtain a constant yield. In the dimerization scenario, all particles are active from the  
 451 outset, hence  $m \sim C$  and therefore,  $\mu^{\text{opt}} \sim \frac{\nu}{S^2}$ . Because dimerization is the time-limiting process in  
 452 the dimerization scenario, this implies for the minimal assembly time

$$453 T_{90}^{\text{min}} \sim \frac{C}{\mu_{\text{tot}}^{\text{opt}}} \sim \frac{1}{SC\mu^{\text{opt}}} \sim \frac{S}{C\nu}. \quad [25]$$



454 So, the argument reproduces the control parameter exponent  $\phi = -2$  and the time complexity  
 455 exponent  $\theta = 1$  for the dimerization scenario for one-dimensional structures. By rescaling  $\nu \rightarrow$   
 456  $\nu S^{(d-1)/d}$  the respective parameter- and time complexity exponents for the higher dimensional cases  
 457 are obtained.

## 458 **Activation scenario**

459 In the activation scenario, we focus again on one-dimensional structures and obtain the scaling  
 460 laws for higher dimensional structures by our rescaling argument. In contrast to the dimerization  
 461 scenario, in the activation scenario the monomers are not active right from the outset. Instead, there  
 462 is a constant influx of monomers that balances a steady consumption of monomers due to binding.  
 463 Hence, the stationary concentration  $m$  of active monomers is determined from the condition that  
 464 the total influx of monomers equals their consumption due to binding:

$$465 \quad \text{total influx rate of monomers} = \text{total consumption of monomers due to binding.} \quad [26]$$

466 With the total influx rate of monomers given by  $\alpha CS$ , this translates into

$$467 \quad \alpha CS = \nu_{\text{tot}} \sim \nu Km, \quad [27]$$

468 where we neglected the consumption of monomers due to dimerization, because for large  $S$  dimer-  
 469 ization is negligible compared to attachment (compare Eq. (21)). Demanding a constant yield,  
 470 we can again assume  $K \sim C$  (constant yield implies a constant fraction of complexes  $K/C$ ), and  
 471 hence,  $m \sim S^{\frac{\alpha}{\nu}}$ . The total nucleation and attachment rate are again given by Eqs. (22) and (23),  
 472 respectively, and therefore Eq. (24) applies identically, yielding

$$473 \quad \alpha^{\text{opt}} \sim \frac{\nu^2 C}{\mu} \frac{1}{S^3}. \quad [28]$$

474 Furthermore, because the influx rate limits the assembly time,

$$475 \quad T_{90}^{\text{min}} \sim \frac{1}{\alpha^{\text{opt}}} \sim \frac{\mu}{C\nu^2} S^3, \quad [29]$$

476 confirming the control parameter exponent  $\phi = -3$  and time complexity exponent  $\theta = 3$  for the  
 477 one-dimensional activation scenario, as well as a quadratic dependence on  $\nu$  that is relevant for the  
 478 rescaling procedure: Replacing  $\nu \rightarrow \nu S^{(d-1)/d}$ , the respective exponents for the higher dimensional  
 479 cases are obtained in the usual way. Note that Eqs. (28) and (29) were derived for a general  
 480 dimerization rate  $\mu$ , although the activation scenario was originally defined with  $\mu = \nu$ . Performing  
 481 the argument with a general  $\mu$  is, however, crucial in order to obtain the correct quadratic dependence  
 482 on  $\nu$  to execute the rescaling argument. This is important because the dimensionality affects the  
 483 typical growth rate of clusters but has no effect on the rate at which clusters nucleate. Therefore,  $\mu$   
 484 and  $\nu$  must be distinguished in order to correctly perform the rescaling to higher dimensionality.

## 485 **JIS scenario**

486 In the JIS scenario the different species are provided sequentially in consecutive batches. In order to  
 487 estimate the total nucleation and attachment rate in Eq. (21), we calculate the total number of  
 488 nucleation and binding events per species in a single assembly step. The number of nucleation events  
 489 will crucially be determined by the number of active monomers that are still unbound when the

490 next batch is supplied: Since the subsequent batch is supplied when most monomers of the previous  
 491 batch have already bound, the remaining monomers encounter many partners to form dimers while  
 492 there are only few remaining binding sites in the clusters. Therefore, the remaining monomers will  
 493 dimerize to the largest extent. In order to estimate the total dimerization rate per assembly step,  
 494 we therefore need to estimate the concentration of remaining monomers in relation to  $\Delta T$ . We do  
 495 this in the following by considering the dynamics of the concentration of monomers of an arbitrary  
 496 species in the sequence.

497 Let  $m$  denote the concentration of monomers of a species  $i$  and  $k$  the concentration of structures  
 498 (binding sites) to which species  $i$  can attach. We assume that at time  $t = 0$ , species  $i$  is supplied  
 499 in initial concentration  $m(0) = M \approx C$ . Each binding event involving species  $i$  reduces both the  
 500 concentration of binding sites  $k$  and the concentration of monomers  $m$  by one unit. Therefore,  
 501  $u := m - k = \text{const}$  is a constant which denotes the excess concentration (i.e. the amount by  
 502 which the total number of monomers  $M$  exceeds the number of binding sites  $k(0) := K$ ). Indeed,  $u$   
 503 corresponds to the increase in concentration from one batch to the next if species are provided in  
 504 non-stoichiometric concentrations. For the dynamics of  $m$  it then follows that

$$505 \quad \frac{d}{dt}m = -\nu mk = -\nu m^2 + \nu um. \quad [30]$$

506 By solving the differential equation, we find the monomer concentration  $m$  at time  $t = \Delta T$ :

$$507 \quad m(\Delta T) = \frac{1}{\frac{1}{u} + \left(\frac{1}{M} - \frac{1}{u}\right) e^{-u\nu\Delta T}} \approx \frac{1}{\frac{1}{u} + \left(\frac{1}{M} - \frac{1}{u}\right) (1 - u\nu\Delta T)} \approx \frac{1}{\nu\Delta T}, \quad [31]$$

508 where in the second step we assumed  $\Delta T \sim 1/(M\nu) \ll 1/(u\nu)$  (because  $u \ll M$ ) and in the last  
 509 step we again used  $1/M \ll 1/u$ . Note that according to Eqs. (1) and (2), the excess concentration  
 510 will be of order  $u \sim (N_{b+1} - N_b) \sim pCS^{-1/d}$ , with  $p \approx 0.1$ , and hence can be assumed to be small  
 511 compared to  $C$  and the initial monomer concentration:  $u \ll M$ .

512 The total number of dimerization events during one assembly step can now be estimated as the  
 513 concentration of monomers of species  $i$  that are still unbound at time  $\Delta T$  when the next binding  
 514 partner, species  $i + 1$ , is supplied (in concentration  $\approx M$ ). More specifically, the total number of  
 515 dimerization events per assembly step is  $\sim m(\Delta T)M \sim \mu_{\text{tot}}$ , while the total number of attachment  
 516 events per assembly step is  $\sim KM \sim \nu_{\text{tot}}$  where  $K := k(0) \sim C$ . Therefore, with Eq. (21),

$$517 \quad \frac{\mu_{\text{tot}}}{\nu_{\text{tot}}} \sim \frac{1}{\nu C \Delta T} \stackrel{!}{\sim} \frac{1}{S}. \quad [32]$$

518 and thus,

$$519 \quad \Delta T^{\text{opt}} \sim \frac{S}{C\nu}, \quad [33]$$

520 yielding the control parameter exponent  $\phi = 1$ . In order to obtain the total assembly time,  $\Delta T$  must  
 521 be multiplied by the total number of batches, which is  $b_{\text{max}} \sim S^{1/d}$  in the case of the ‘onion-skin’  
 522 supply protocol (see Fig. 5C). Therefore,

$$523 \quad T_{90}^{\text{min}} \sim \Delta T^{\text{opt}} S^{1/d} \sim \frac{S^{1+\frac{1}{d}}}{C\nu}, \quad [34]$$

524 yielding the time complexity exponent  $\theta = 1 + \frac{1}{d}$ , where  $d$  is the dimensionality.

## Reversible binding for 2D and 3D structures

For the reversible binding scenario in two and three dimensions we can use the same approach as for the irreversible scenarios, starting from Eq. (21). The key insight is that during the assembly process stable intermediate assembly products form that decay only with rate  $\delta_2 \ll \delta_1$  or  $\delta_3 \lll \delta_1$  and hence are considered as long-lived on the relevant timescale. In contrast, intermediate states that decay with rate  $\delta_1$  are highly unstable and decay quickly as  $\delta_1$  is typically large compared to the reactive timescale  $C\nu$  in the reversible binding scenario. Figure S4 shows how the resulting total nucleation rate  $\mu_{\text{tot}}$  ( $\mu_{\text{tot}}$  here denotes the total nucleation rather than dimerization rate) and total attachment rate  $\nu_{\text{tot}}$  can be estimated. Here nucleation is an effective four-particle reaction that proceeds via two unstable intermediate states. If the detachment rate  $\delta_1$  is large, the effective per capita rate for the four-particle reaction can be approximated as  $\mu\nu^2/\delta_1^2$  and the total nucleation rate is given by  $\mu_{\text{tot}} \sim \frac{\mu\nu^2}{\delta_1^2} m^4 S$  (the factor  $S$  accounts for the fact that there are  $S$  possible combinations of species that can form a nucleus). Attachment typically proceeds in two steps. The first step, analogous to the nucleation process, can be approximated as an effective two-particle reaction passing through an unstable intermediate state (see Figure S4). The effective total rate for the first step is therefore  $\sim \frac{\nu^2}{\delta_1} K m^2 S^{\frac{d-1}{d}}$ , where  $K$  is the total concentration of complexes and the factor  $S^{\frac{d-1}{d}}$  estimates the number of possible binding sites for the first monomer (surface area of an average cluster). Once a new stable state has formed, a cascade of subsequent stable states can be traversed by attachment of additional monomers. Because in this second step the complex only passes through stable states, the second step can be assumed to be fast compared to the first step. We estimate the average number of monomers attaching in the second step to scale again proportionally to the cluster surface  $\sim S^{\frac{d-1}{d}}$ . This yields an additional stoichiometric factor to be accounted for in the total attachment rate, resulting in  $\nu_{\text{tot}} \sim \frac{\nu^2}{\delta_1} K m^2 S^{(2-\frac{2}{d})}$ . With Eq. (21), it follows that

$$\frac{\mu_{\text{tot}}}{\nu_{\text{tot}}} \sim \frac{\mu C}{\delta_1} S^{(\frac{2}{d}-1)} \lesssim \frac{1}{S}, \quad [35]$$

and, therefore,

$$\delta_1^{\text{opt}} \sim \mu C S^{\frac{2}{d}}, \quad [36]$$

with a control parameter exponent  $\phi = \frac{2}{d}$ . Since nucleation is the slowest step, we expect the minimal assembly time to scale approximately as the timescale of nucleation:

$$T_{90}^{\text{min}} \sim \frac{C}{\mu_{\text{tot}}} \sim \frac{C}{\mu \left(\frac{\nu}{\delta_1^{\text{opt}}}\right)^2 m^4 S} \sim \frac{\mu}{\nu(C\nu)} S^{\frac{4}{d}-1}, \quad [37]$$

yielding a time complexity exponent  $\theta = \frac{4}{d} - 1$ . Although the theoretical estimates for the exponents in the reversible binding scenario in higher dimensions do not coincide perfectly with the simulated values (compare main text Fig. 2B,C and Fig. 3B), their tendency and the dependence on the dimensionality of the structure are correctly predicted and explained. We suspect that the main reason for the deviations is a slight actual dependence of the average monomer concentration  $m$  on  $S$ , which has been neglected in this scaling argument.

In conclusion, note that for all four scenarios, the scaling exponents for one-dimensional structures could be derived exactly from our scaling analysis. In contrast, for higher dimensional structures, the theoretical estimates generally do not fit the simulated values exactly. This may have various reasons like, for example, deviations from the presumed effective growth rate  $\nu_S \sim \nu S^{\frac{d-1}{d}}$  that we used to rescale the exponent for the dimerization and activation scenario.

565 Furthermore, note that in the scaling argument applied to the reversible binding scenario in  
566 higher dimensions we used some specificities of the structure, most importantly, the number of  
567 unstable intermediate states in the processes of nucleation and attachment. This suggests that the  
568 exponents and the time efficiency of the reversible binding scenario are not fully generic but depend  
569 on the shape of the structure and the constituents. In contrast, the scaling arguments for the other  
570 scenarios are fully generic, so we do not expect a significant dependence of the time efficiency on  
571 specificities of the structure in the irreversible scenarios.

## 572 4. Robustness to model modifications

573 To verify that our time complexity analysis is robust to model modifications, we investigated three  
574 variants of the original model and the assembly kinetics. Figure S5 shows the minimal assembly  
575 time for these variants in all four scenarios. The results of the analysis are discussed in the following.

576 **Structures with periodic boundaries.** First we simulated the minimal assembly time for structures  
577 with periodic boundaries. While in the main text we only considered higher dimensional structures  
578 with an open boundary, some typical examples of self-assembling systems comprise the formation of  
579 closed structures with periodic boundaries, for instance, two-dimensional shells and capsids such  
580 as, for example, virus capsids (5, 6). To assess the relevance of the boundary, we simulated the  
581 minimal assembly time for two-dimensional periodic structures or tori. In all scenarios we measured  
582 almost the same time complexity exponent as in the original model. Only in the reversible binding  
583 scenario the exponent appears to be slightly larger. In the activation, dimerization and reversible  
584 binding scenario, the time efficiency increases as a consequence of the modified boundary condition  
585 since a closed boundary effectively enhances the possibility of a cluster to grow, thereby increasing  
586 the effective binding rate. In the JIS scenario, the time efficiency slightly decreases because the  
587 species at the boundary induce an increased excess dimerization rate compared to the case with  
588 non-periodic boundary. Also note that, in the JIS scenario, we simulated periodic structures only  
589 with an even edge length  $L$ , since for odd  $L$  it would have been necessary to modify the supply  
590 order of our protocol in order to make sure that species supplied in the same batch do not bind each  
591 other. Moreover, we increased the excess concentrations  $Z_n$  (see Eqs. (1) and (2)) of the species  
592 at the boundary by a factor of 2 or 4, respectively, to achieve optimal efficiency for the modified  
593 boundaries.

594 **Heterogeneous binding rates.** Next, we investigated the impact of heterogeneous binding rates on  
595 the assembly time. Considering a heterogeneous system, the assumption of identical binding rates for  
596 all species is an idealization. More realistically, the rates will vary to a certain extent. We therefore  
597 simulated the system with heterogeneous rates for the different species, drawn independently from a  
598 (truncated) normal distribution with a coefficient of variation of 50%. We truncated the normal  
599 distribution for values that are below 20% of the mean in order to guarantee that individual rates do  
600 not become negative or very small. For each run the binding rates were chosen independently and the  
601 assembly times were averaged over 10-100 independent runs. We did not perform the simulations for  
602 the activation scenario since the simulation of the activation scenario is based on the homogeneous  
603 approximation and the results would thus not be reliable for heterogeneous rates of the species.  
604 In the other scenarios, the measured time complexity exponents are almost identical to those of  
605 the original model with homogeneous rates. Only in the dimerization scenario the time complexity  
606 exponent seems somewhat smaller, probably because heterogeneity in the rates influences the typical  
607 shapes in which clusters grow. In all cases, the time efficiency was reduced as a consequence of  
608 heterogeneous rates because small rates influence the overall effective timescale more significantly  
609 than the large rates.

610 **Reduced resource efficiency.** Finally, we altered the definition of the assembly time and explored  
611 its effect on the time complexity. In the main text we chose 90% yield as termination criterion  
612 for the assembly process. Here, we asked whether the exponents are invariant if a lower resource  
613 efficiency of only 50% yield is demanded. In all scenarios, the minimal time  $T_{50}^{\min}$  required to achieve  
614 50% yield is significantly smaller than  $T_{90}^{\min}$ . With the exception of the activation scenario, however,  
615 the corresponding time complexity exponents are indistinguishable from those determined for  $T_{90}^{\min}$ .

616 For the activation scenario, the exponent appeared to be a bit larger, very close to the theoretical  
617 value  $\Theta_{\text{th}} = 2$ . We relate this slight discrepancy between the two exponents to the fact that the  
618 yield transition curves in the activation scenario (compare main text Fig. 4B) become steeper if  $S$  is  
619 increased. This indicates that the real asymptotic exponent for the activation scenario lies between  
620 the exponents measured for  $T_{50}^{\text{min}}$  and  $T_{90}^{\text{min}}$ . Note that, among the four scenarios, the time efficiency  
621 of the reversible binding scenario increases the most if lower resource efficiency is demanded.

622 **Annealing (reversible binding scenario).** The reversible binding scenario is controlled by the ratio  
623 between the detachment rate and the growth rate, given by the product of the binding rate  $\nu$  and the  
624 concentration of monomers (see main text, paragraph reversible binding scenario). However, when  
625 more and more particles get attached during the assembly process, the concentration of monomers -  
626 if not replenished - gradually decreases. Consequently, the controlling parameter increases during  
627 the assembly process. In order to counteract this effect, a frequently used experimental approach  
628 consists in ‘annealing’ the system by decreasing the temperature (7). Typically, one starts at high  
629 temperature and gradually cools the system down to room temperature. Since the detachment  
630 rate decreases with decreasing temperature,  $\delta \sim e^{-E_B/(k_B T)}$ , if applied optimally, annealing allows  
631 to keep the ratio between detachment rate and growth rate constant during the assembly process.  
632 Here we ask how the time efficiency in the reversible binding scenario behaves under an optimal  
633 annealing protocol. To this end, we assume that the temperature adapts instantaneously to the  
634 momentary concentration of monomers such that the ratio between detachment rate and monomer  
635 concentration remains constant throughout the simulation. By varying this fixed ratio we determine  
636 the minimal assembly time  $T_{90}^{\text{min}}$  as in the main text. Indeed we find that the assembly efficiency  
637 can be significantly increased with an optimal annealing protocol, however, the time complexity  
638 exponent remains invariant (see Figure S5A, star marker).

639 **Alternate input functions (activation scenario).** For the activation scenario in the main text we  
640 assumed a constant influx of active monomers until all inactive monomers are depleted. Hence, the  
641 input as a function of time has a rectangular shape. A natural question that arises is whether the  
642 efficacy of the activation scenario can be altered by changing the temporal form of the input. To  
643 answer this question we simulated various different input functions which correspond to different  
644 biophysical processes providing the active monomers. Here we discuss one particular example for  
645 such a differing form of the temporal input which plays an important role in biology (8). Specifically,  
646 we assume that activation of monomers is no longer irreversible but, instead, monomers can switch  
647 back and forth between an assembly-active and inactive configuration (reversible activation cycle).  
648 Furthermore, we assume that this switching dynamics is fast compared to the assembly time scale  
649 and hence can be considered to be at equilibrium. The control parameter is the equilibrium constant  
650  $K$ , which describes the ratio between the concentrations of active and inactive monomers. By  
651 measuring the minimal assembly time in the usual way, we find that the activation scenario becomes  
652 slightly more efficient through the reversible activation cycle but that the time complexity exponent  
653 remains invariant (see Fig. S5C, star marker).

654 Theoretically, the input can be described by any arbitrary function that integrates to the total  
655 particle number  $N$ . Note that input via fast reversible activation has a special significance because  
656 through equilibration it allows the net influx rate to dynamically adopt to the current state of the  
657 assembling system (fast binding of active monomers  $\rightarrow$  fast net influx, and vice versa). We also  
658 tested some other input functions and observed that it generally seems to be favourable for the time  
659 efficiency if the input is higher at the beginning of the assembly process and lower towards the end.  
660 The measured time complexity exponents however remained invariant for all tested input functions.

661 This leads us to hypothesise that the time complexity exponent cannot be altered by the form the  
662 monomer input as long as all species are treated indifferently.

663 In conclusion, we tested how robust our results are with respect to modifications of the model,  
664 affecting the boundary of the structures, heterogeneities in the rates or the demanded resource  
665 efficiency. Furthermore, we investigated differing experimental protocols like annealing or variable  
666 input functions for the activation scenario. We found that while the assembly time does indeed  
667 depend on details of the model and the assembly protocol, the time complexity exponents - apart  
668 from minor deviations - remain invariant to such variations. Furthermore, the general trend in  
669 response to a particular model variation is typically the same in the different scenarios (an exception  
670 is the modification of the boundary condition in the JIS scenario). This confirms that the general  
671 conclusions in the main text on the time efficiency of the different scenarios and their relative  
672 ranking remain largely valid if details of the system are changed. On a broader perspective, this  
673 shows that the time complexity analysis yields a reliable, robust and informative characterization  
674 of self-assembly processes and the distinction of the four scenarios, characterized by different time  
675 complexity exponents, is meaningful and useful.

## 676 5. Experimental JIS supply protocol for the assembly of an artificial $T=1$ capsid

677 In this last chapter we aim to demonstrate the applicability of the just-in-sequence supply strategy  
678 for actual experimental problems of interest by proposing a specific supply protocol for the assembly  
679 of an artificial  $T = 1$  capsid.

680 Artificial shells and capsids have important potential biotechnological applications ranging from  
681 the compartmentalization of chemical reactions to the usage as vesicles that enable pinpoint delivery  
682 of drugs or other material to specific loci within an organism (9, 10). Other applications intend to  
683 use artificial shells with an aperture in order to trap virus particles inside and thereby prevent them  
684 from interacting with the host cells (11). The hope is that in this way a broadly applicable antiviral  
685 platform can be created that can be utilized to combat a broad range of viral infections. Due to  
686 these promising applications, we illustrate the usage of the Jis strategy for the assembly of artificial  
687 capsids.

688 The simplest icosahedral capsid is the  $T = 1$  capsid (classification by Caspar and Klug (12)),  
689 which is assembled from 60 proteins. In the following, we discuss two possibilities to assemble  
690 artificial  $T=1$  capsids irreversibly with high yield solely by regulating the supply of constituents.  
691 These strategies thereby avoid the necessity of fine-tuning the binding strengths or other molecular  
692 properties. The first possibility assumes a partly homogeneous design of the capsid (see Fig. S6A),  
693 while the second possibility relies on a fully heterogeneous design (Fig. S6C) of the structure.

694 In principle, the  $T = 1$  capsid can be build fully homogeneously out of 60 identical units. However,  
695 in order to use the just-in-sequence supply strategy as described in the main text, some degree of  
696 heterogeneity is necessary: constituents that are provided in the same batch should not be able to  
697 bind each other but only to the existing structures. We therefore propose the partly heterogeneous  
698 design depicted in Fig. S6A, which exploits the symmetry of the target structure. Components that  
699 are indicated by the same letter are identical and bind specifically only with those species that are  
700 adjacent to them.

701 Designing structures as homogeneously as possible has three practical advantages. First, a lower  
702 number of different components needs to be produced and counted, which reduces the experimental  
703 effort. Second, self-assembly is faster if a single type of constituent can bind to several distinct sites  
704 in the structure and finally, as we discuss below, the absolute tolerance to external noise in particle  
705 numbers increases if structures are more homogeneous.

706 Note, however, that for the assembly of spherical objects like the  $T=1$  capsid, a difficulty arises  
707 concerning the upper and the lower "cap", denoted here by A and L, respectively: If the caps are  
708 composed of several copies of a single species, these copies would be able to form homo-multimers  
709 when they are supplied, thereby undermining the JIS strategy. This challenge can be circumvented  
710 either by designing the caps heterogeneously or by making the respective bonds between the cap-  
711 species weak and reversible, thereby preventing spurious nucleation. Another possibility is to produce  
712 the caps A and L separately and supply them as single, complete units. In the following, for the  
713 assembly of the partly homogeneous capsid, we further discuss the second possibility, considering  
714 the caps A and L as single units.

715 Figures S6B and D show possible supply protocols for the assembly of the partly homogeneous  
716 and the heterogeneous  $T=1$  capsid, respectively. Both of these protocols were found by maximizing  
717 the yield in the simulation. The second column in the tables indicates the species that are supplied  
718 in the respective batch, while the third column shows the numbers  $Z_b$  that describe the excess  
719 concentrations supplied for the species in the respective batch, see Eqs. (1) and (2). The total  
720 number  $N_b$  of particles for each species supplied in the  $b^{\text{th}}$  batch (fourth column) is given by (compare



721 Eq. (2))

$$722 \quad N_b = \text{deg} \cdot \left( (1 - p)N + pSN \frac{Z_b}{Z_{\text{tot}}} \right), \quad [38]$$

723 where deg is the *degeneracy* of the species, denoting the number of distinct binding positions per  
724 structure for this species in the respective assembly step. For the partly homogeneous capsid, the  
725 degeneracy is deg = 5 for all species except for the caps which are provided as complete units with  
726 degeneracy deg = 1. It is likely that the efficiency of the supply strategy can be further improved  
727 by allowing the pairs of species C and D, F and G, as well as I and J, which are supplied in the  
728 same batches, to be assigned different particle numbers. For simplicity, however, in this example we  
729 assign particle numbers only in correspondence to the batch number.

730 Figure S7A shows the yield plotted against the interval  $\Delta T$  between successive batches both for  
731 the partly homogeneous and the heterogeneous  $T = 1$  capsid. Black circles indicate the position  
732 of the optimal interval  $\Delta T_{\text{opt}}$  that minimizes the time required to achieve 90% yield. The partly  
733 homogeneous capsids can be assembled in shorter time (provided that the same number of structures  
734 is assembled) because the binding speed is larger roughly by a factor of 5 compared to the fully  
735 heterogeneous  $T = 1$  capsid.

736 In applications, particle numbers can only be determined with limited accuracy. Hence, it is an  
737 essential question how robust this approach is to extrinsic noise in the particle numbers. In order  
738 to test the robustness to extrinsic noise we choose particle numbers randomly from a Gaussian  
739 distribution and quantify the noise level in terms of the coefficient of variation (CV), defined as  
740 the standard deviation of the particle numbers relative to their respective mean. For simplicity, we  
741 assume that the CV is the same for all species. Figure S7B shows the yield plotted against the time  
742 interval  $\Delta T$  for the partly homogeneous  $T = 1$  capsid depending on the coefficient of variation. The  
743 inset shows the maximum yield (achieved for sufficiently large  $\Delta T$ ) plotted against the CV, both  
744 for the partly homogeneous and the heterogeneous design. As a rough estimate, for the two supply  
745 protocols discussed here, particle numbers would need to be chosen with an accuracy of about 1% in  
746 order to achieve high yield. For a fixed relative strength of noise compared to the mean (CV), the  
747 partly homogeneous capsid is slightly more robust than the heterogeneous structure. This implies  
748 that the absolute tolerable variability in the number of particles per species is larger by at least a  
749 factor of 5 for the partly homogenous capsid compared to the heterogeneous capsid.

750 In conclusion, we found that both the partly homogeneously as well as the heterogeneously designed  
751  $T = 1$  capsid could be assembled efficiently with an irreversible just-in-sequence supply strategy  
752 provided that particle numbers can be determined accurately enough. The supply protocols discussed  
753 here still leave space for improvement, for example, by assigning particle numbers individually for  
754 each species rather than only in correspondence to the batch number. Furthermore, the excess  
755 concentrations were chosen in order to guarantee maximal yield for  $\Delta T \rightarrow \infty$  but have not been  
756 optimized for maximal robustness to external noise. Those improvements might allow to even further  
757 improve the efficiency and robustness of the approach. Hence, provided that experimental methods  
758 for the accurate counting of molecules can be established, the JIS scenario offers a versatile strategy  
759 for the realization of biotechnologically relevant macromolecular structures. Our work therefore  
760 highlights how new experimental strategies to control concentrations could advance nanotechnology  
761 and its applications.

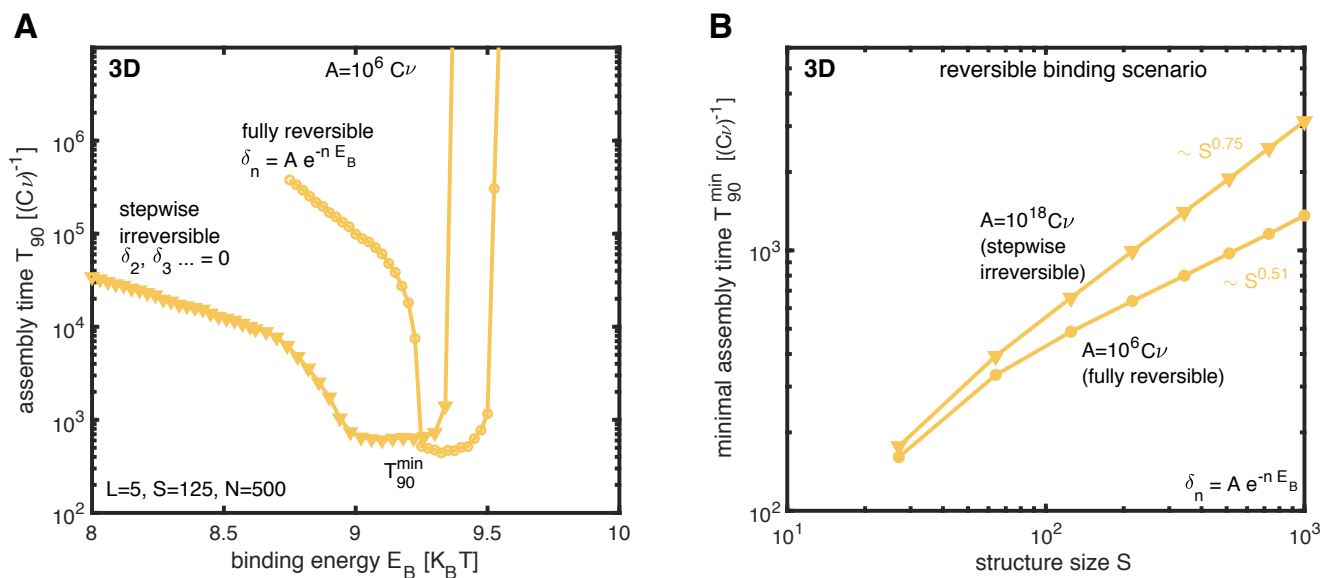

**Fig. S1. Reversible binding scenario: influence of the preexponential factor on the assembly time.** **A**, assembly time  $T_{90}$  versus the binding energy  $E_B$  for small preexponential factor  $A = 10^6 C\nu$  (marker: circle) for three-dimensional structures of size  $S = 125$ . For comparison, we also plotted the stepwise irreversible case (marker: triangle) setting all detachment rates except for  $\delta_1$  to 0. The stepwise irreversible case is equivalent to choosing  $A$  large (in the main text:  $A = 10^{18} C\nu$ ) as in both cases only  $\delta_1$  is effectively larger than 0 and all other detachment rates are negligible at close-to-optimal binding energies. Hence, a small preexponential factor  $A$  slightly decreases the minimal assembly time (compared to large  $A$ ) at the cost of a reduced variability in the binding energy (fine tuning of  $E_B$  (or of the concentration  $C$ ) becomes more critical with small  $A$ ). **B**, minimal assembly time  $T_{90}^{\min}$  versus the structure size  $S$  for large (stepwise irreversible) and small (fully reversible) preexponential factor  $A$ . The minimal assembly time that can be achieved as well as the time complexity exponent are slightly smaller for a small preexponential factor.

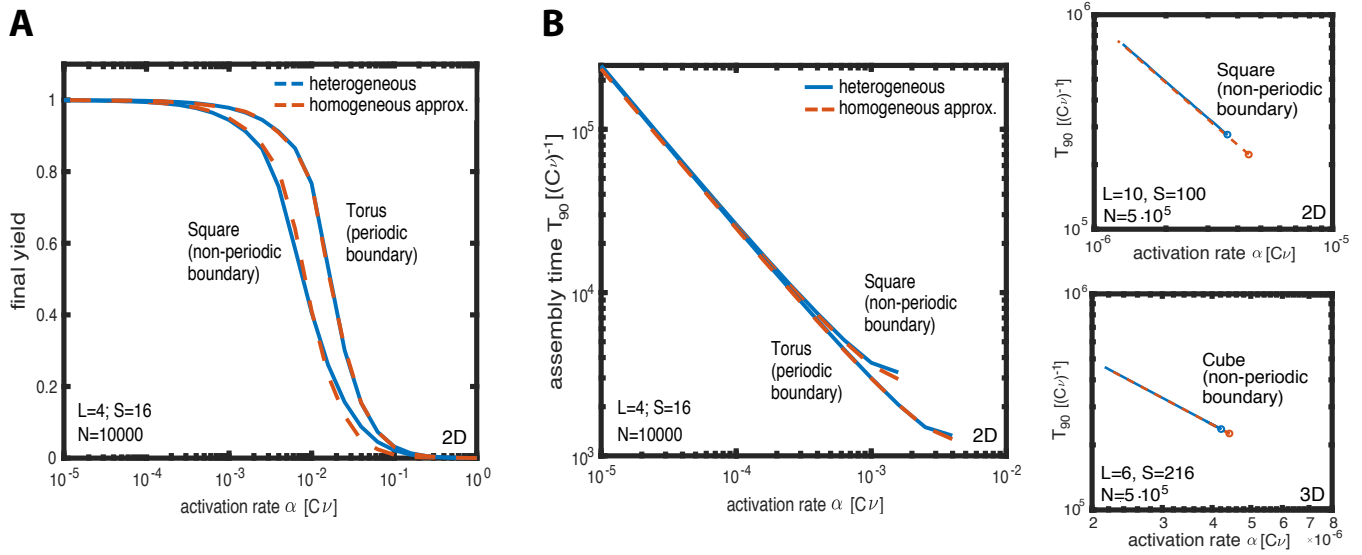

**Fig. S2. Accuracy of the homogeneous approximation in the activation scenario.** Final yield (A) and assembly time  $T_{90}$  (B) versus the activation rate. Both quantities were simulated for two-dimensional structures with and without periodic boundaries as well as with distinguishable (heterogeneous, blue drawn line) and indistinguishable particle species (homogeneous approximation, red dashed line). For structures with periodic boundaries and large particle number  $N$ , the homogeneous and heterogeneous simulation coincide exactly as predicted by the theory. For structures with non-periodic boundaries, the homogeneous system yields an accurate approximation of the heterogeneous system, in particular if the target structure is small. For larger target structures in 2D, small deviations in the minimal assembly time are observed. For three-dimensional structures, these deviations are extremely tiny even for large target structures. We exploited this equivalence to reduce the computational cost by simulating the activation scenario as a homogeneous system with lower particle number. Generally, the heterogeneous system is subject to stochastic effects arising from fluctuations between the concentrations of the different species, unless the particle number  $N$  is large (see (2)). The homogeneous system, in contrast, can be simulated with a much smaller total number of particles. The observed deviations suggest that the approximation slightly underestimates the time complexity exponent for two-dimensional heterogeneous structures by a few percent.

|      |      |     |     |     |     |     |      |      |
|------|------|-----|-----|-----|-----|-----|------|------|
| ix   | viii | vii | vi  | v   | vi  | vii | viii | ix   |
| viii | vii  | vi  | v   | iv  | v   | vi  | vii  | viii |
| vii  | vi   | v   | iv  | iii | iv  | v   | vi   | vii  |
| vi   | v    | iv  | iii | ii  | iii | iv  | v    | vi   |
| v    | iv   | iii | ii  | i   | ii  | iii | iv   | v    |
| vi   | v    | iv  | iii | ii  | iii | iv  | v    | vi   |
| vii  | vi   | v   | iv  | iii | iv  | v   | vi   | vii  |
| viii | vii  | vi  | v   | iv  | v   | vi  | vii  | viii |
| ix   | viii | vii | vi  | v   | vi  | vii | viii | ix   |

**Fig. S3. Assigning particle numbers in the Jis scenario.** The just-in-sequence scenario requires specified ratios between particle numbers in order to avoid excessive competition for resources (see Eq. (1)). Shown is the onion supply protocol (analogous to Fig. 5C) for a two-dimensional structure of size  $L=9$  ( $S=81$ ). Roman numbers indicate the batch number (assembly step) in which species are supplied. The shaded square marks all species that can initiate a complex potentially able to bind the species highlighted in red in the seventh assembly step. In order to minimize competition for resources, the species in the seventh batch must hence be supplied in excess concentration  $Z_7$  proportional to the area of the square to allow all clusters present at the seventh assembly step to grow. Generalizing, we hence find the excess concentration  $Z_n \sim \left(\frac{n+1}{2}\right)^2$  for a species supplied in the  $n^{\text{th}}$  batch (compare Eq. (2)).

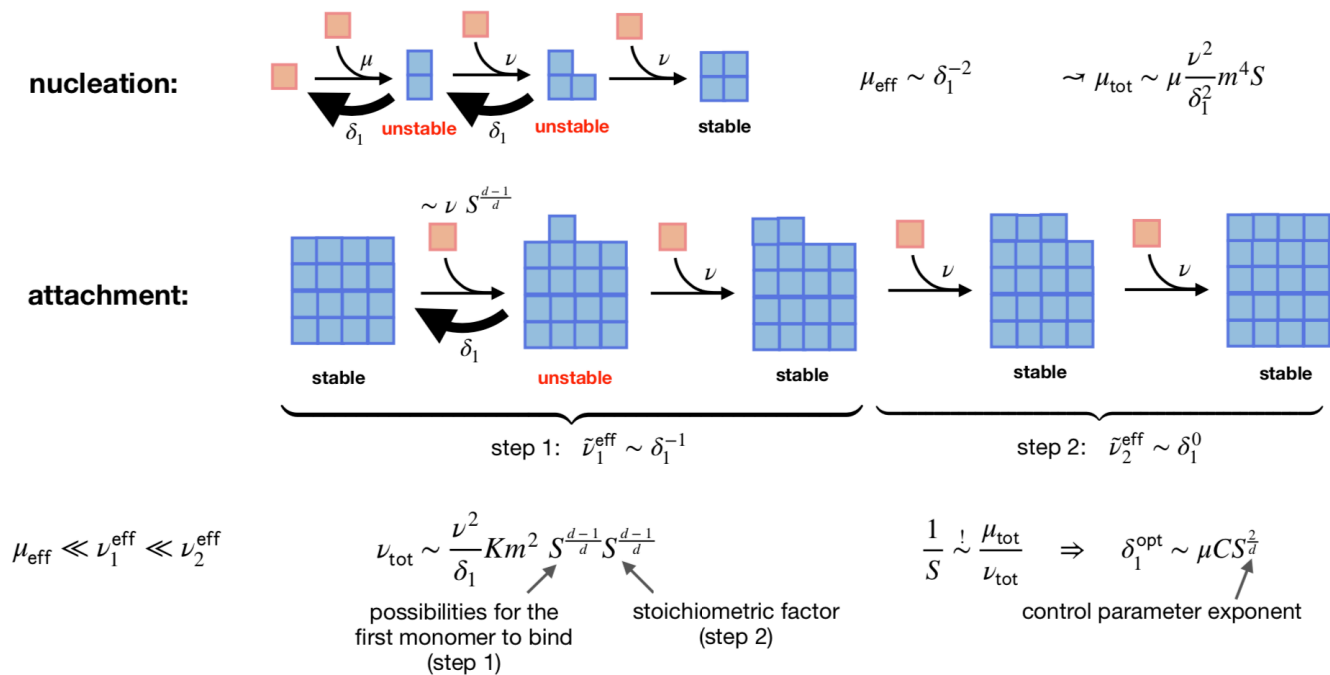

**Fig. S4. Scaling analysis of the reversible binding scenario.** In the reversible binding scenario, a stable nucleus forms by passing through two unstable intermediate states that decay with rate  $\delta_1$ . Hence, the effective rate for the nucleation process is  $\mu_{\text{eff}} \sim \delta_1^{-2}$ . Attachment typically proceeds in two steps. In the first step, a monomer first binds reversibly and must subsequently be stabilized by a second monomer. Because one unstable state is passed, the first step effectively happens at rate  $\nu_1^{\text{eff}} \sim \delta_1^{-1}$ . Subsequently to the first step, additional monomers can attach 'filling the row', while the configuration is continuously stable. Therefore, the second step can be assumed to be fast compared to the first step which, in turn, is fast compared to nucleation:  $\mu_{\text{eff}} \ll \nu_1^{\text{eff}} \ll \nu_2^{\text{eff}}$ . By setting the total nucleation rate into relation with the total effective attachment rate as detailed in section 3 of this SI, a rough estimate for the control parameter exponent and for the time complexity exponent can be derived.

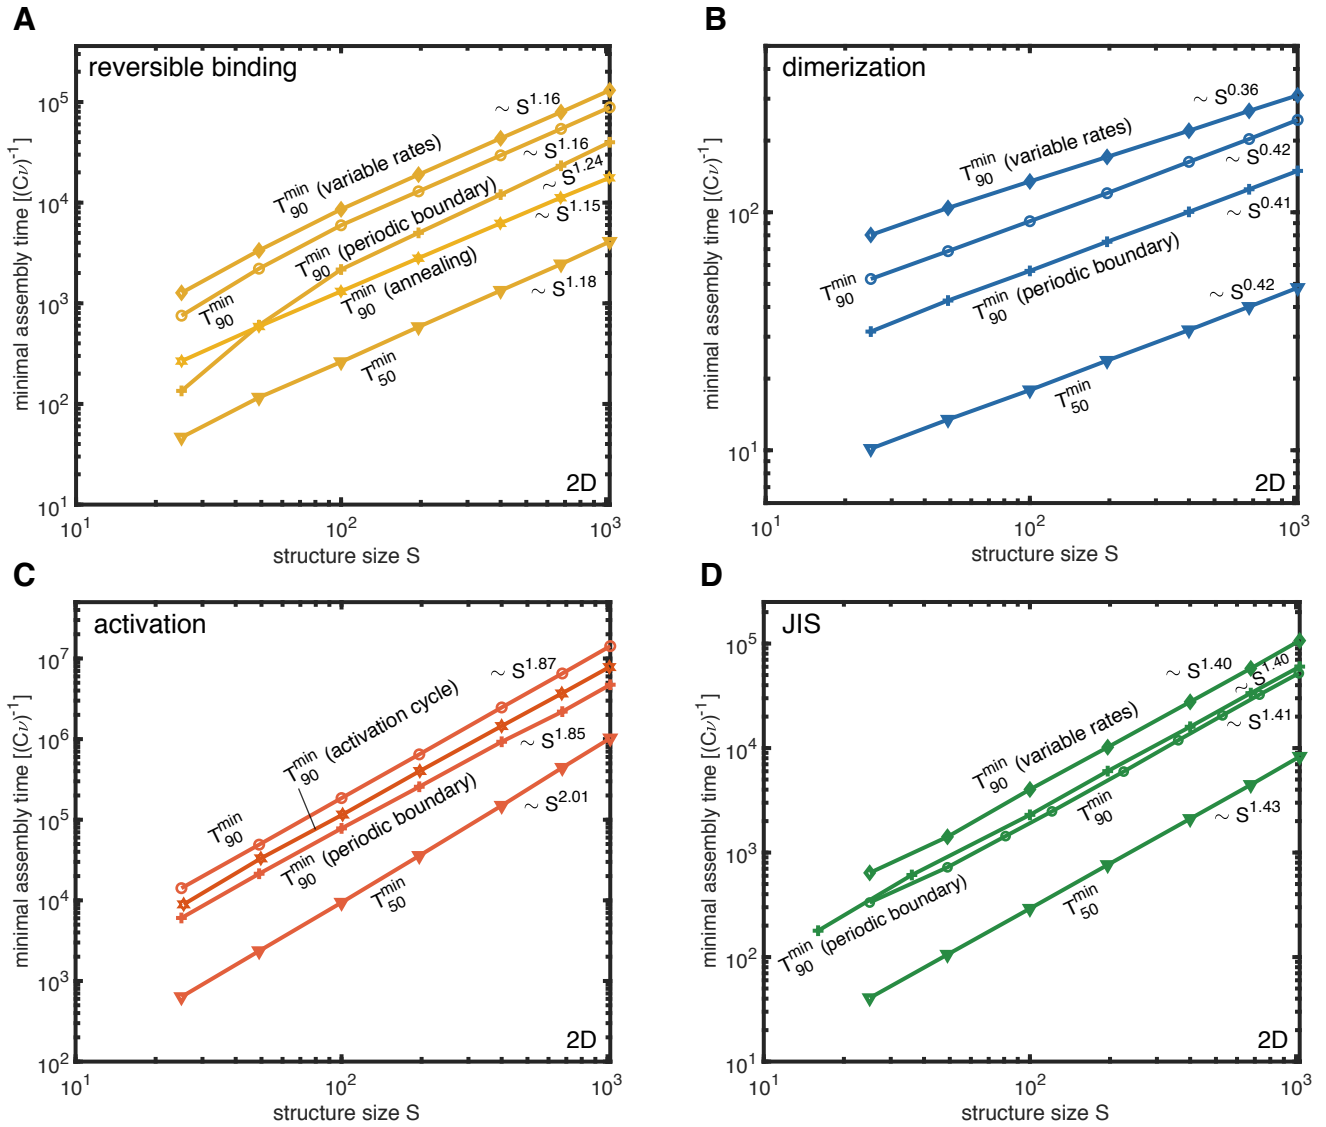

**Fig. S5. Scaling of the minimal assembly time for variants of the model and assembly kinetics.** The minimal time required to achieve 90% ( $T_{90}^{\min}$ ) or 50% yield ( $T_{50}^{\min}$ ) in the different scenarios (A, reversible binding; B, dimerization; C, activation and D, just-in-sequence scenario) is shown in dependence of the target structure size  $S$  for two-dimensional structures and different variants of the original model. In each subpanel (scenario), the curve labeled  $T_{90}^{\min}$  corresponds to the assembly time in the original model. Furthermore, each subpanel shows  $T_{90}^{\min}$  for 2D structures with periodic boundary (tori) as well as for variable or heterogeneous rates of the constituent species (not available for the activation scenario), see section 4 of this SI. The curve labelled  $T_{50}^{\min}$  shows the minimal assembly time for a lower resource efficiency of only 50% yield. While the assembly time varies for the different model variants, the measured time complexity exponents are, aside from small deviations, largely invariant. This indicates that the time complexity analysis of the self-assembly scenarios is robust and independent of many details of the model.

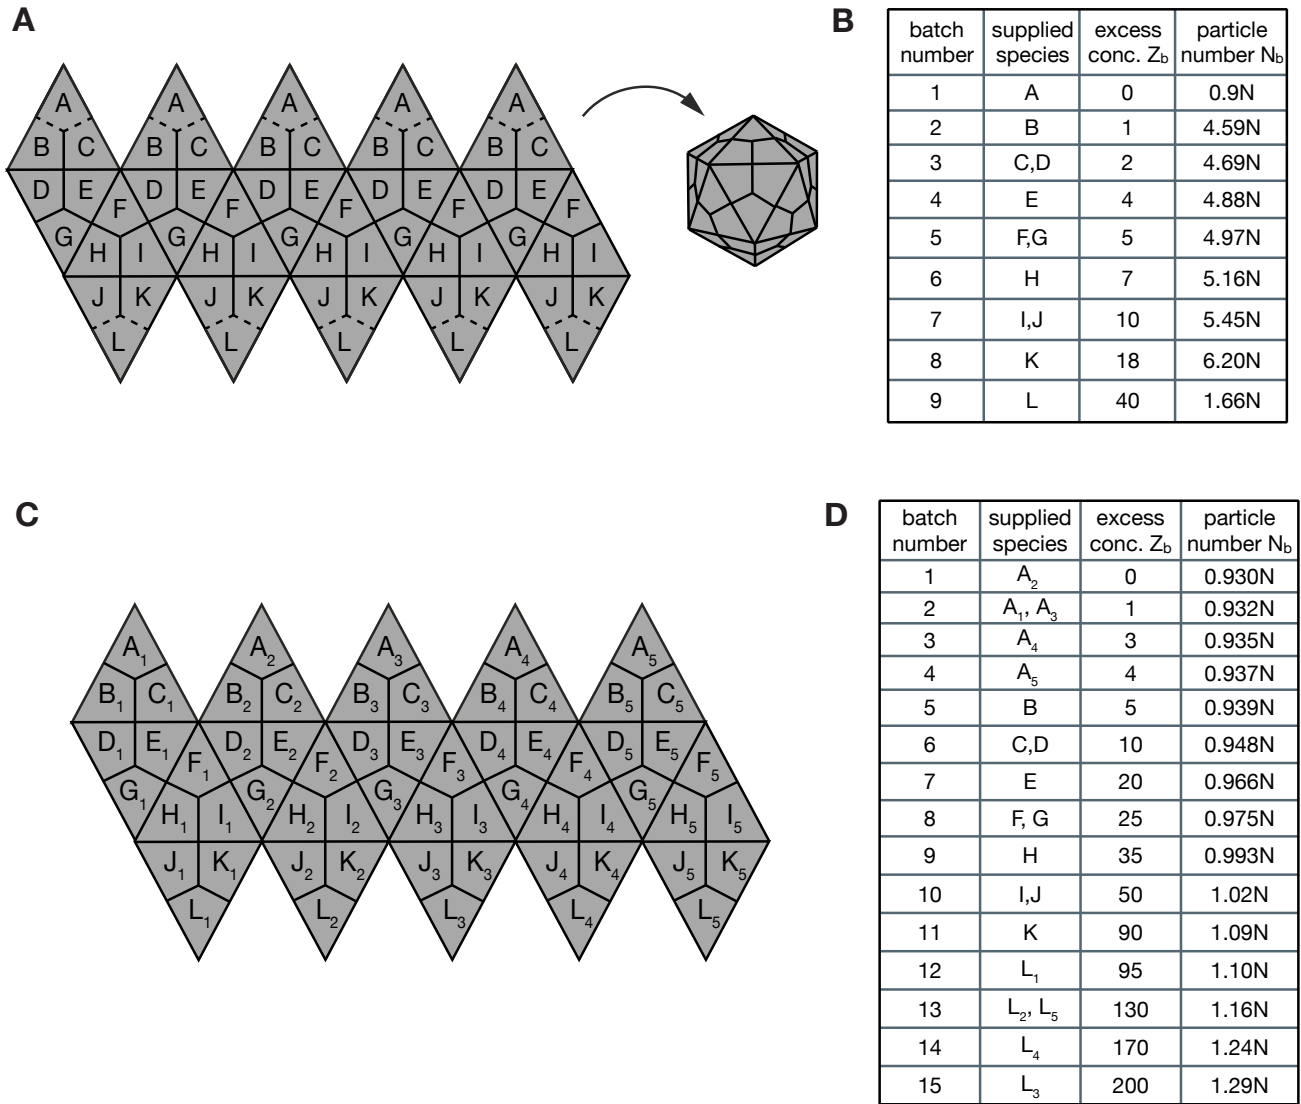

**Fig. S6. Capsid structure and supply protocols.** **A**, Partly homogeneous design of the T=1 capsid consisting of 60 subunits and 12 different species. Species of subunits are indicated by capital letters. It is assumed that each species binds specifically only with those species adjacent to it. Furthermore, we assume that the caps, each consisting of 5 subunits of A and L, respectively, are assembled separately and are supplied as complete single units. **B**, Just-in-sequence supply protocol that was simulated in order to assemble the capsid with the structure defined in (A). Columns indicate the species that are supplied in a respective batch, their excess concentration and their resulting total particle numbers assuming a fraction of unevenly distributed resources of  $p = 0.07$  (cf. Eq. (38)). Here,  $N$  is the number of complete structures to be built if the yield were 100%. **C**, Heterogeneous design of the T=1 capsid consisting of 60 subunits and 60 different species. Each species occupies a single specified position in the structure. **D**, Just-in-sequence supply protocol for the heterogeneous structure described in (B). Letters without indices in the protocol represent all 5 corresponding species (for example  $B = \{B_1, B_2, B_3, B_4, B_5\}$ ), which are supplied simultaneously. Note that for the heterogeneously designed capsid the caps are assembled from monomers as well.

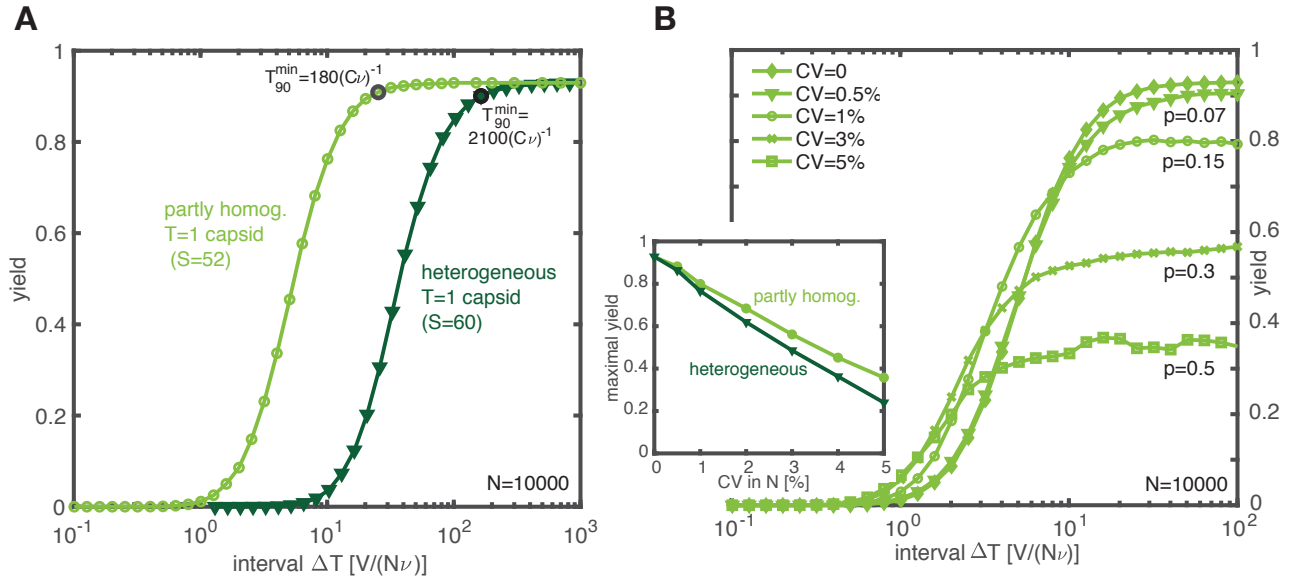

**Fig. S7. Jis scenario for the T=1 capsid.** **A**, Final yield plotted against the interval  $\Delta T$  between subsequent batches both for the partly homogeneous and the heterogeneous capsid (see Fig. S6). Black circles indicate the position of the optimal interval  $\Delta T_{opt}$  and the corresponding minimal assembly time  $T_{90}^{min}$ . Simulations were performed for a maximal number of complete structures  $N = 10^4$  and a fraction of resources that are distributed unevenly of  $p = 0.07$  (cf. Eq. (38)), which limits the yield to 93%. The partly homogeneous structure can be assembled faster than the heterogeneous structure, mainly because the binding speed is larger by a factor of 5 in the partly homogeneous capsid. **B**, Yield plotted against the interval  $\Delta T$  for different levels of external noise in the particle numbers for the partly homogeneous capsid. For each species, the particle number from the protocol was perturbed independently with a specified coefficient of variation (CV := Gaussian standard deviation / mean). Inset shows the maximal yield for sufficiently large  $\Delta T$  plotted against the coefficient of variation for the partly homogeneous and the heterogeneous structure. The fraction  $p$  of resources that were distributed unevenly was chosen as follows:  $p = 0.07$  for  $CV \leq 0.5\%$ ,  $p = 0.15$  for  $CV=1\%$ ,  $p = 0.2$  for  $CV=2\%$ ,  $p = 0.3$  for  $CV=3\%$ ,  $p = 0.36$  for  $CV=4\%$  and  $p = 0.5$  for  $CV=5\%$ .



763 **References**

- 764 1. DT Gillespie, Stochastic simulation of chemical kinetics. *Annu. Rev. Phys. Chem.* **58**, 35–55  
765 (2007).
- 766 2. FM Gartner, IR Graf, P Wilke, PM Geiger, E Frey, Stochastic yield catastrophes and robustness  
767 in self-assembly. *Elife* **9**, e51020 (2020).
- 768 3. PD Schnier, JS Klassen, EF Strittmatter, ER Williams, Activation energies for dissociation of  
769 double strand oligonucleotide anions: Evidence for watson- crick base pairing in vacuo. *J. Am.*  
770 *Chem. Soc.* **120**, 9605–9613 (1998).
- 771 4. K Bielec, et al., Kinetics and equilibrium constants of oligonucleotides at low concentrations.  
772 Hybridization and melting study. *Phys. Chem. Chem. Phys.* **21**, 10798–10807 (2019).
- 773 5. D Endres, A Zlotnick, Model-based analysis of assembly kinetics for virus capsids or other  
774 spherical polymers. *Biophys. journal* **83**, 1217–1230 (2002).
- 775 6. JM Almendral, Assembly of simple icosahedral viruses. *Struct. physics viruses* **68**, 307–328  
776 (2013).
- 777 7. CG Evans, E Winfree, Physical principles for dna tile self-assembly. *Chem. Soc. Rev.* **46**,  
778 3808–3829 (2017).
- 779 8. GR Lazaro, MF Hagan, Allosteric control of icosahedral capsid assembly. *The J. Phys. Chem.*  
780 *B* **120**, 6306–6318 (2016).
- 781 9. JG Heddle, S Chakraborti, K Iwasaki, Natural and artificial protein cages: design, structure  
782 and therapeutic applications. *Curr. opinion structural biology* **43**, 148–155 (2017).
- 783 10. B Schwarz, M Uchida, T Douglas, Biomedical and catalytic opportunities of virus-like particles  
784 in nanotechnology. *Adv. virus research* **97**, 1–60 (2017).
- 785 11. C Sigl, et al., Programmable icosahedral shell system for virus trapping. *Nat. Mater.* **20**,  
786 1281–1289 (2021).
- 787 12. DL Caspar, A Klug, Physical principles in the construction of regular viruses in *Cold Spring*  
788 *Harbor symposia on quantitative biology*. (Cold Spring Harbor Laboratory Press), Vol. 27, pp.  
789 1–24 (1962).
